# 1 Multiple shifts in gene network 2 interactions shape phenotypes of 3 *Drosophila melanogaster* selected for 4 long and short night sleep duration

5 Caetano Souto-Maior<sup>1\*</sup>, Yanzhu Lin<sup>1‡</sup>, Yazmin L. Serrano Negron<sup>1</sup>, Susan T.  
6 Harbison<sup>1\*</sup>

**\*For correspondence:**

[caetano.soutomaior@nih.gov](mailto:caetano.soutomaior@nih.gov);  
[susan.harbison@nih.gov](mailto:susan.harbison@nih.gov)

**Present address:** <sup>‡</sup>Eli Lilly and Co.,  
Lilly Corporate Center,  
Indianapolis, IN, United States of  
America

7 <sup>1</sup>Laboratory of Systems Genetics, National Heart Lung and Blood Institute, National  
8 Institutes of Health, Bethesda, MD, United States of America

---

10 **Abstract** All but the simplest phenotypes are believed to result from interactions between two  
11 or more genes forming complex networks of gene regulation. Sleep is a complex trait known to  
12 depend on the system of feedback loops of the circadian clock, and on many other genes;  
13 however, the main components regulating the phenotype and how they interact remain an  
14 unsolved puzzle. Genomic and transcriptomic data may well provide part of the answer, but a full  
15 account requires a suitable quantitative framework. Here we conducted an artificial selection  
16 experiment for sleep duration with RNA-seq data acquired each generation. The phenotypic  
17 results are robust across replicates and previous experiments, and the transcription data  
18 provides a high-resolution, time-course data set for the evolution of sleep-related gene  
19 expression. In addition to a Hierarchical Generalized Linear Model analysis of differential  
20 expression that accounts for experimental replicates we develop a flexible Gaussian Process  
21 model that estimates interactions between genes. 145 gene pairs are found to have interactions  
22 that are different from controls. Our method not only is considerably more specific than  
23 standard correlation metrics but also more sensitive, finding correlations not significant by other  
24 methods. Statistical predictions were compared to experimental data from public databases on  
25 gene interactions.

---

## 27 Introduction

28 Despite the plethora of modern and increasingly refined molecular biology assays – from DNA to  
29 metabolites and beyond – systematically uncovering the molecular bases of phenotypes remains  
30 one of the thorniest challenges in biology. “Omics” approaches allow whole genome, transcrip-  
31 tome, proteome, and other “omes” to be generated and candidate genes to be fished out of these  
32 high dimensional data, but understanding how these biomolecules interact even in the simplest  
33 pathways requires painstaking follow-on experimentation, construction of databases, and an im-  
34 mense collective effort to make connections from disjointed assays into a coherent model. De-  
35 spite the large amount of studies and data generated for many systems, identifying underlying  
36 processes is still very rare; this is clear indication that better methods are needed to obtain un-  
37 derstanding of biological processes from data. For complex traits the task is even more difficult.  
38 Sleep is a complex phenotype the evolution of which remains a classic mystery in biology. Although  
39 sleep and sleep-like behavior is conserved among species, its main purpose is not completely un-

40 derstood, and hypotheses for its purpose span functions like conservation of resources (*Berger*  
41 *and Phillips, 1995; Scharf et al., 2008; Schmidt, 2014*), pruning of synapses and memory formation  
42 (*Krueger and Obál, 1993; Tononi and Cirelli, 2014; Joiner, 2016; Ly et al., 2018*), and management  
43 of metabolite and waste products (*Xie et al., 2013; Hill et al., 2020*). It is plausible that sleep is a  
44 manifestation of multiple functions, and that it involves the activity of many genes to regulate a  
45 complex higher-level function; indeed many genes have been implicated in sleep (*Harbison et al.,*  
46 *2017, 2013; Laing et al., 2019; Dashti et al., 2019; Jones et al., 2016; Jansen et al., 2019; Lane et al.,*  
47 *2019; Hammerschlag et al., 2017; Diessler et al., 2018; Joshi et al., 2019; Boyle et al., 2017*). Assum-  
48 ing anything but the simplest possible model would therefore require a description that accounts  
49 for this complexity in the interactions of genes and gene products.

50 Artificial selection plus sequencing/resequencing is a powerful approach for identifying herita-  
51 ble variation in phenotypes and their underlying molecular bases (*Schlötterer et al., 2015*), typically  
52 assaying DNA or RNA expression in the initial and evolved populations and comparing them to con-  
53 trols (*Faria et al., 2015, 2016*). Coupling selection with gene expression identified candidate genes  
54 for diurnal preference (*Pegoraro et al., 2020*), olfactory behavior (*Brown et al., 2017, 2020*), food  
55 consumption (*Garlapow et al., 2017*), mating behavior (*Mackay et al., 2005*), resistance to para-  
56 sitism (*Wertheim et al., 2011*), environmental stressors (*Telonis-Scott et al., 2009; Sørensen et al.,*  
57 *2007*), ethanol tolerance (*Morozova et al., 2007*), and aggressive behavior (*Edwards et al., 2006*).  
58 Caveats of that method include often not having molecular data on the intermediate generations,  
59 and relying on traditional statistical methods to assess the significance of polymorphic variants. In  
60 the case of gene expression, RNA levels are often modeled for each gene individually using linear  
61 models, without further consideration of the processes involved or interactions between genes.  
62 Inferring interaction between genes (as opposed to individual changes) requires observations of  
63 how the genes covary in time. Correlation or information theory-based methods (and others, re-  
64 viewed in *Emmert-Streib et al. (2012); Villaverde and Banga (2014); Liu (2015)*) could be applied to  
65 estimate the relationship between the genes when that information is present, but neither is time  
66 course data usually available, nor are these methods standard in artificial selection experiments.

67 In this work we have artificially selected *Drosophila melanogaster* for increased or decreased  
68 night sleep duration and sequenced the mRNA of the flies from each generation of selection.  
69 The selection procedure produced both long- and short-sleeping fly populations significantly de-  
70 viant from unselected controls. The RNA sequence data, which consisted of expression levels as  
71 a function of time (measured in generations), was analyzed using a Multi-Channel Gaussian Pro-  
72 cess (*Melkumyan and Ramos, 2011; Bonilla et al., 2008*) where each gene is described by one of  
73 these “channels”, and their relationships are estimated by an underlying covariance structure in  
74 the model. We describe the expression of 85 genes that had significant changes in the artificial  
75 selection long or short schemes along generation common to both males and females. We used  
76 this model to infer the magnitude of all 3,570 possible pairwise interactions between all possible  
77 pairs of genes. Results from this analysis and comparison to unselected controls suggest that mul-  
78 tiple shifts in interactions underlie the increase and decrease of night sleep duration, with 145  
79 interactions not being observed in the controls.

## 80 **Methods and Materials**

### 81 **Construction of outbred population**

82 We constructed an outbred population of flies – using ten lines from the *Drosophila* Genetic Refer-  
83 ence Panel (DGRP) (*Mackay et al., 2012; Huang et al., 2014*) with extreme night sleep phenotypes  
84 (*Harbison et al., 2013*). Five lines had the shortest average night sleep for both males and females  
85 combined in the population: DGRP\_38, DGRP\_310, DGRP\_365, DGRP\_808, DGRP\_832. The other  
86 five lines had the longest average night sleep in the population: DGRP\_235, DGRP\_313, DGRP\_335,  
87 DGRP\_338, and DGRP\_379. The ten lines were crossed in a full diallel design, resulting in 100  
88 crosses. Two virgin females and two males from the F1 of each cross were randomly assigned into

89 20 bottles, with 10 males and 10 females placed in each bottle. At each subsequent generation, 20  
90 virgin females and 20 males from each bottle were randomly mixed across bottles to propagate  
91 the next generation. The census population size was 800 for each generation of random mating.  
92 This mating scheme was continued for 21 generations, resulting in the Sleep Advanced Intercross  
93 Population, or SAIP (*Harbison et al., 2017; Serrano Negron et al., 2018*). The SAIP was maintained  
94 by pooling the flies from each bottle together, then randomly assigning 20 males and 20 females  
95 to each bottle each generation.

### 96 **Artificial selection procedure for night sleep**

97 At generation 47 of the SAIP, we began the artificial selection procedure, which we defined as gener-  
98 ation 0. We seeded six bottles with 25 males and 25 females mixed from all bottles of the outbred  
99 population. Two replicate bottles were designated for the short-sleeping protocol (S1 and S2), two  
100 for the long-sleeping protocol (L1 and L2), and two for a control (unselected) protocol (C1 and C2).  
101 Each generation, 100 virgin males and 100 virgin females were collected from each of the six popu-  
102 lation bottles. Virgins were maintained at 20 individuals to a same-sex vial for four days to control  
103 for the potential effects of social exposure on sleep (*Ganguly-Fitzgerald et al., 2006*). Flies were  
104 placed into Trikinetics (Waltham, MA) sleep monitors, and sleep and activity were recorded contin-  
105 uously for four days. We used an in-house C# program (R. Sean Barnes, personal communication)  
106 to calculate sleep duration, bout number, and average bout length during the night and day, as  
107 well as waking activity. We also calculated sleep latency, defined as the number of minutes prior  
108 to the first sleep bout after the incubator lights turn off. In addition, we computed the coefficient  
109 of environmental variation ( $CV_E$ ) for each sleep trait as the product of the standard deviation in  
110 each replicate population ( $\sigma$ ) divided by the mean ( $\mu$ )  $\times 100$  (*Mackay and Lyman, 2005*).

111 All sleep traits including night sleep duration were averaged over the four-day period. For the  
112 short (long)-sleeping populations, we chose the 25 males and 25 females in each replicate popula-  
113 tion having the lowest (highest) average night sleep as parents for the next generation. Any flies  
114 found dead were discarded, and the next shortest (longest)-sleeping fly was used in order to en-  
115 sure that 25 females and 25 males were used as parents. For the control populations, we chose 25  
116 males and 25 females at random to start the next generation. Flies were not mixed across replicate  
117 populations. We repeated this procedure for 13 generations.

### 118 **Quantitative genetic analyses of selected and correlated phenotypic responses**

We analyzed the differences in night sleep among selection populations as well as other potentially  
correlated sleep traits using a mixed analysis of variance (ANOVA) model:

$$Y = \mu + Sel + Rep(Sel) + Sex + Gen \\ + Sel \times Sex + Sel \times Gen + Rep(Sel) \times Sex + Rep(Sel) \times Gen + Sex \times Gen \\ + Sel \times Sex \times Gen + Rep(Sel) \times Sex \times Gen + \varepsilon$$

where  $Y$  is the phenotype;  $\mu$  is the overall phenotypic mean;  $Sel$ ,  $Sex$ , and  $Gen$  are the fixed effects of selection scheme (short- or long-sleeper), sex, and generation, respectively;  $Rep$  is random effect of replicate population; and  $\varepsilon$  is the error term. The  $CV_E$  traits were assessed using the same model with the replicate terms removed. A statistically significant  $Sel$  term indicates a response of the trait to selection for night sleep; a significant  $Sel \times Sex$  term indicates a sex-specific response to selection. We repeated the analysis for sexes separately using the reduced model

$$Y = \mu + Sel + Rep(Sel) + Gen + Sel \times Gen + Rep(Sel) \times Gen + \varepsilon$$

where the terms are as defined above. We also analyzed the response to selection in each gener-  
ation separately using the reduced model

$$Y = \mu + Sel + Rep(Sel) + Sex + Sel \times Sex + Rep(Sel) \times Sex + \varepsilon$$

and the reduced model

$$Y = \mu + Sel + Rep(Sel) + \varepsilon$$

119 for each sex separately per generation.

Finally, we analyzed the change in sleep parameters over generations in the control populations using the model

$$Y = \mu + Rep + Sex + Gen + Rep \times Sex + Rep \times Gen + Sex \times Gen + Rep \times Sex \times Gen + \varepsilon$$

120 where each factor is as defined above.

## 121 RNA extraction and sequencing

122 As described above, sleep was monitored in 100 virgin males and 100 virgin females each genera-  
123 tion. Twenty-five flies of either sex were used as parents for the next generation, leaving 75 flies of  
124 each sex in each selection and control population. Four pools of 10 flies of each sex were chosen  
125 at random from these 75 flies and frozen for RNA extraction at 12:00 pm. RNA was extracted from  
126 two of these pools; the remaining two pools were kept as back-up samples and used if needed.  
127 Samples were collected for the initial generation (0), and all subsequent generations. RNA was  
128 extracted using Qiazol (Qiagen, Hilden, Germany), followed by phenol-chloroform extraction, iso-  
129 propanol precipitation, and DNase digestion (Qiagen, Hilden, Germany). Qiagen RNeasy MinElute  
130 Cleanup kits (Qiagen, Hilden, Germany) were used to purify RNA according to the manufacturer's  
131 instructions. With the exception of generation 1, which had RNA that was degraded, RNA from all  
132 other generations was sequenced. This produced 312 RNA samples (6 populations  $\times$  13 genera-  
133 tions  $\times$  2 sexes  $\times$  2 replicate RNA samples).

134 Poly-A selected stranded mRNA libraries were constructed from 1  $\mu$ g total RNA using the Illu-  
135 mina TruSeq Stranded mRNA Sample Prep Kits (Illumina, San Diego, CA) according to manufac-  
136 turer's instructions with the following exception: PCR amplification was performed for 10 cycles  
137 rather than 15 in order to minimize the risk of over-amplification. Unique barcode adapters were  
138 applied to each library. Libraries were pooled for sequencing. The pooled libraries were sequenced  
139 on multiple lanes of an Illumina HiSeq2500 using version 4 chemistry to achieve a minimum of 38  
140 million 126 base read pairs. The sequences were processed using RTA version 1.18.64 and CASAVA  
141 1.8.2.

## 142 RNA alignment of reads

143 Sequences were assessed for standard quality parameters using fastqc (0.11.4) (Babraham Insti-  
144 tute, Cambridge, UK). Reads were aligned to the FB2015\_04 Release 6.07 reference annotation of  
145 the *Drosophila melanogaster* genome using STAR (Dobin et al., 2013). Default parameters were  
146 used except that the minimum intron size was specified as 2, and the maximum intron size was  
147 specified as 268,107, consistent with the largest intron size in the *D. melanogaster* genome. STAR  
148 outputs aligned sequence to a SAM file format, which contains the code 'NH' (Dobin et al., 2013).  
149 An NH of 1 indicates a uniquely mapped read, while NH > 1 indicates that the read did not map  
150 uniquely. HTSeq was used to count only the uniquely mapped reads (NH = 1) (Anders et al., 2015).

## 151 Principal Component Analysis (PCA)

152 It was expected from previous studies of gene expression that there would be large differences in  
153 gene expression due to sex (Lin et al., 2016; Jin et al., 2001; Arbeitman et al., 2002; Parisi et al.,  
154 2003; ?; Harbison et al., 2005; Wayne et al., 2007; Zhang et al., 2007; Ayroles et al., 2009; Huylmans  
155 and Parsch, 2014; Huang et al., 2015). We performed Principal Component Analysis to assess  
156 those differences (Supplementary Figure S1). The principal components of the normalized RNA-  
157 seq count normalized matrix were computed, with each gene being treated as a different variable,  
158 and each sample a different observation. Samples were projected in the planes of the three first  
159 components, and clustering according to the experimental labels was inspected visually.

## 160 Gene normalization and filtering

161 The combined genic and intergenic counts were normalized by the expression of a pseudo-reference  
162 sample computed from the geometric mean of all samples, using the method described by **Love**  
163 **et al. (2014)**. Filtering was performed by computing the 95<sup>th</sup> percentile of the distribution of nor-  
164 malized, base 2 logarithm, levels in the intergenic regions for males and females and using those  
165 values as cut-off level for the genic regions – i.e. any genes that did not have expression above this  
166 level for at least one sample were removed from further analyses (**Zhang et al., 2010**). The (linear  
167 scale) cutoff expression value for males was 48.6, and for females 102.

## 168 Generalized Linear Model analysis of expression data

169 Analysis of differential expression between selection schemes was initially performed for each  
170 gene independently. Given the separation of the expression levels by sex seen in the PCA anal-  
171 ysis, analyses were conducted separately for the subsets of male or female flies.

172 We implemented a generalized linear model (GLM) with a hierarchical structure to account  
173 for non-independent, replicate-specific parameters. The description is similar to a generalized  
174 linear mixed model (GLMM), but uses a Bayesian formulation to specify the hyper-priors and is  
175 fully described below. Normalization factors for the RNA levels was performed using the scheme  
176 described by **Love et al. (2014)**. A negative binomial likelihood was used and parameterized with  
177 the mean (given by the prediction of the linear model) and dispersion parameters; the number of  
178 samples (156 for each sex) allowed estimation of the latter together with model coefficients, dis-  
179 pensing with the need of other schemes applied when the number of samples is small, commonly  
180 implemented in some packages.

Bayesian inference was used and parameter priors were exploited to treat replicate effects  
in a hierarchical formulation (**Gelman et al., 2013**). Specifically, for each replicate-dependent pa-  
rameter (say  $\beta_{short,rep}$ ), two parameters were specified at the top-level ( $\mu_{short}$  and  $\sigma_{short}$ ), given  
(hyper-)priors, and estimated from the data together with all other parameters. Below that, both  
replicate-specific model parameters ( $\beta_{short,1}$  and  $\beta_{short,2}$ ) are given the same gaussian prior us-  
ing top-level parameters (e.g.  $\beta_{short,1} \sim \mathcal{N}(\mu_{short}, \sigma_{short})$  for that coefficient in replicate 1 as well  
as replicate 2). Under this formulation the full model for the expression of a gene  $j$  is given by  
 $\log\mu_j \propto sel_{rep} + gen + sel \times gen_{rep}$ , where a relationship between each set of replicate-dependent  
parameters is enforced hierarchically through their higher level common parameters and hyper-  
priors. Explicitly, we have:

$$\eta_j = \log\mu_j \\ = [\beta_1, \beta_2, \beta_{short,1}, \beta_{short,2}, \beta_{long,1}, \beta_{long,2}, \beta_{gen}, \beta_{short \times gen,1}, \beta_{short \times gen,2}, \beta_{long \times gen,1}, \beta_{long \times gen,2}]X$$

181 where  $X$  is the design matrix, with binary 0/1 variables indicating parameters that apply to specific  
182 treatments (e.g. the entries multiplying  $\beta_1, \beta_2$ , are present for all, that  $\beta_{short,1}$  is present for short  
183 sleepers from replicate 1, etc.) except for parameters dependent on the  $gen$  variable which takes  
184 the value of the generation (e.g. 0 through 13 for the entries multiplying the  $\beta_{gen}$  parameter in all  
185 treatments, and for those multiplying  $\beta_{short \times gen,1}$  for short sleepers from replicate 1, etc.). Table 1  
186 lists all parameters, their descriptions, design matrix values associated to them, and priors.

187 Maximum a posteriori probability (MAP) estimates and confidence intervals were obtained us-  
188 ing the Stan package (**Carpenter et al., 2017**). Significance was calculated using a likelihood ratio  
189 test comparing the point estimates from the full model to a reduced model not including the inter-  
190 action terms (i.e.  $\log\mu_{j,rep} = sel_{rep} + gen$ ). Model  $p$ -values were corrected for multiple testing using  
191 the Benjamini-Hochberg method (**Benjamini and Hochberg, 1995**), with significance defined at the  
192 0.001 level.

## 193 Calculation of non-parametric correlations between genes

194 The correlation coefficients ( $\rho$ ) between any two pairs of genes can be computed directly from  
195 the data. Pearson correlation assumes the relationship between the two variables is linear, while



**Table 1.** Parameter names, description, design values, and priors for Bayesian inference ( $\bar{y}_0$  denotes the mean expression of all samples at generation zero).

| Parameter                    | Description                                                    | Design values | Prior                                                            |
|------------------------------|----------------------------------------------------------------|---------------|------------------------------------------------------------------|
| $\mu_{control}$              | Hyperprior on mean of $\beta_{rep}$                            | n/a           | $\mathcal{N}(\bar{y}_0, 1)$                                      |
| $\sigma_{control}$           | Hyperprior on (square root of) variance of $\beta_{rep}$       | n/a           | $Cauchy(0, 1)$                                                   |
| $\mu_{short}$                | Hyperprior on mean of $\beta_{short,rep}$                      | n/a           | $\mathcal{N}(0, 1)$                                              |
| $\sigma_{short}$             | Hyperprior on variance of $\beta_{short,rep}$                  | n/a           | $Cauchy(0, 1)$                                                   |
| $\mu_{long}$                 | Hyperprior on mean of $\beta_{long,rep}$                       | n/a           | $\mathcal{N}(0, 1)$                                              |
| $\sigma_{long}$              | Hyperprior on variance of $\beta_{long,rep}$                   | n/a           | $Cauchy(0, 1)$                                                   |
| $\mu_{short \times gen}$     | Hyperprior on mean of $\beta_{short \times gen,rep}$           | n/a           | $\mathcal{N}(0, 1)$                                              |
| $\sigma_{short \times gen}$  | Hyperprior on variance short of $\beta_{short \times gen,rep}$ | n/a           | $Cauchy(0, 1)$                                                   |
| $\mu_{long \times gen}$      | Hyperprior on mean of $\beta_{long \times gen,rep}$            | n/a           | $\mathcal{N}(0, 1)$                                              |
| $\sigma_{long \times gen}$   | Hyperprior on variance of $\beta_{long \times gen,rep}$        | n/a           | $Cauchy(0, 1)$                                                   |
| $\beta_1$                    | Intercept for replicate 1                                      | 0, 1          | $\mathcal{N}(\mu_{control}, \sigma_{control})$                   |
| $\beta_2$                    | Intercept for replicate 2                                      | 0, 1          | $\mathcal{N}(\mu_{control}, \sigma_{control})$                   |
| $\beta_{short,1}$            | Effect from short sleeper, replicate 1 treatment               | 0, 1          | $\mathcal{N}(\mu_{short}, \sigma_{short})$                       |
| $\beta_{short,2}$            | Effect from short sleeper, replicate 2 treatment               | 0, 1          | $\mathcal{N}(\mu_{short}, \sigma_{short})$                       |
| $\beta_{long,1}$             | Effect from long sleeper, replicate 1 treatment                | 0, 1          | $\mathcal{N}(\mu_{long}, \sigma_{long})$                         |
| $\beta_{long,2}$             | Effect from long sleeper, replicate 2 treatment                | 0, 1          | $\mathcal{N}(\mu_{long}, \sigma_{long})$                         |
| $\beta_{gen}$                | Treatment-independent generation effect                        | 0 – 13        | $\mathcal{N}(0, 2)$                                              |
| $\beta_{short \times gen,1}$ | Interaction short by generation, rep 1 effect                  | 0 – 13        | $\mathcal{N}(\mu_{short \times gen}, \sigma_{short \times gen})$ |
| $\beta_{short \times gen,2}$ | Interaction short by generation, rep 2 effect                  | 0 – 13        | $\mathcal{N}(\mu_{short \times gen}, \sigma_{short \times gen})$ |
| $\beta_{long \times gen,1}$  | Interaction long by generation, rep 1 effect                   | 0 – 13        | $\mathcal{N}(\mu_{long \times gen}, \sigma_{long \times gen})$   |
| $\beta_{long \times gen,2}$  | Interaction long by generation, rep 2 effect                   | 0 – 13        | $\mathcal{N}(\mu_{long \times gen}, \sigma_{long \times gen})$   |
| $\alpha$                     | Negative binomial dispersion                                   | n/a           | $Uniform(0, 10^9)$                                               |

196 Spearman correlation is rank-based and therefore accommodates non-linear relationships, although  
 197 it still assumes the relationship is monotonically increasing or decreasing. We therefore computed  
 198 Spearman correlations between genes that were found to be significant for both males and fe-  
 199 males in the GLM analysis -- one correlation coefficient was obtained for the data subset from  
 200 each sex-selection combination. The significance of each correlation coefficient is tested using the  
 201 null hypothesis that  $\rho = 0$ . Because the main interest is the interaction between genes in the se-  
 202 lected populations that are different from controls we compare the coefficients by computing and  
 203 comparing the confidence intervals for  $\rho_{sel}$  (where *sel* can be “short” or “long”) and  $\rho_{control}$  using  
 204 the normal approximation to  $\arctanh(\rho)$  (**Ruscio, 2008**). We note that this is not exactly equivalent  
 205 to the significance testing of the null hypothesis that  $\rho_{sel} = \rho_{control}$  (**Austin and Hux, 2002**) (which  
 206 relies on computing the confidence interval for  $\rho_{sel} - \rho_{control}$  using the same method), since it over-  
 207 estimates the total variance (i.e., one would find fewer significant instances). Nevertheless, the  
 208 approach is valid and is more broadly applicable, in that it can be computed when a joint distribu-  
 209 tion with the two variables cannot be obtained – we use the term “significant” for either kind of  
 210 difference, but explicitly state which one is used.

## 211 Gaussian Process regression

212 Gaussian Processes (GP) are an alternative function-space formulation to the well-known weight-  
 213 space linear models of the form  $y = f(x) + \varepsilon$ ; their use dates back to the 19<sup>th</sup> century and they  
 214 have been covered extensively in the statistical and information theory literature (**MacKay, 2003**),  
 215 becoming popular in machine learning applications (**Bishop, 2006; Rasmussen and Williams, 2006**),  
 216 and more recently implemented in less technical contexts like the life sciences (**Schulz et al., 2018**).

217 We give a brief overview of their usefulness, motivate their use in this work, and point to the refer-  
218 ences above for formal description of the method.

219 The weight-space linear model expresses the observations in terms of explicit linear coefficients  
220 (or weights) of the independent variable,  $x$ , possibly with further basis function expansions (e.g.  
221 square,  $x^2$ , or higher order polynomials,  $x^n$ ), for instance  $y = \beta_0 + \beta_1 x + \beta_2 x^2 + \varepsilon$ , (where  $\varepsilon$  is nor-  
222 mally distributed noise). Gaussian Processes describe the basis functions implicitly instead, with  
223  $y \sim \mathcal{N}(\mu, K)$ ; that is, a set  $y$  of  $N$  observations is distributed according to a multivariate normal  
224 distribution with mean given by the vector  $\mu$  (of size  $N$ ) and covariance between the values of  $x$   
225 given by the matrix  $K$  (with dimension  $N \times N$ ). The entries of this matrix in row  $i$ , column  $j$  are  
226 defined by some covariance function such that  $k_{ij} = \text{cov}(x_i, x_j)$  – if the covariance function is linear  
227 in the values of  $x$ , for instance, the prediction for  $y$  is a straight line similar to  $y = \beta_0 + \beta_1 x$ . Formu-  
228 lating the model in terms of function-space enables the use of flexible sets of basis functions; this  
229 approach of only implicitly describing a basis function, thus avoiding specification of a potentially  
230 large basis is called the “kernel trick”. Function like the commonly used squared exponential kernel  
231 can be shown to be equivalent to an infinite number of basis functions (*Rasmussen and Williams,*  
232 **2006**), and therefore cannot be incorporated in the explicit terms of the weight-space formulation.

233 While Gaussian Processes are a classic formulation in statistics, the recent surge in machine  
234 learning applications has popularized its use in the natural sciences. They have been used to ana-  
235 lyze gene expression by using their flexible output in combination with ordinary differential equa-  
236 tions put (*Honkela et al., 2010; Äijö et al., 2013; Aalto et al., 2020*), with clustering approaches  
237 (*McDowell et al., 2018*), within other regression models (*Kontio and Sillanpää, 2019*), or modeling  
238 spatial covariance (*Arnol et al., 2019*). In the context of our experimental design Gaussian Process  
239 Regression could be used as a flexible alternative to GLMs, with each selection scheme having a  
240 different mean function  $\mu_{sel}$  and a squared exponential covariance function  $k(x, x') = \sigma_f^2 c(x, x') =$   
241  $\sigma_f^2 \exp\left(-\frac{|x-x'|^2}{2\ell^2}\right)$  where  $x$  takes the values of the generations in our experiment. The exponentiated  
242 term gives the correlation  $c(x, x')$  between a pair of time points, with parameter  $\ell$  modulating the  
243 correlation level given a distance  $r = x - x'$ , and  $\sigma_f^2$  being the signal variance of the data. Under this  
244 model, unlike with the GLM analysis, the change in RNA-seq counts is a function not of slope coef-  
245 ficients but of the signal variance  $\sigma_f^2$ . It is worth noting that the signal variance is a scalar constant  
246 for all terms in the covariance matrix, so it can also be written as  $K = \sigma_f^2 C$ , where  $C$  is analogous  
247 to  $K$  but with correlations instead of covariances, a notation that will be useful shortly.

## 248 Multi-channel Gaussian Processes

249 Despite the extensive use of Gaussian Processes, most applications in the life sciences have been  
250 restricted to single-channel GPs; that is, models that only describe one set of observations at a time  
251 (here the expression time series for a single gene). These models – in this aspect not unlike GLMs  
252 – describe expression of genes independently, i.e. they implicitly assume genes do not interact  
253 in any way. Gaussian Processes can however be extended to include covariance between two or  
254 more sets of observations, a formulation that seems to be underexploited in the biological litera-  
255 ture (but see *Velten et al. (2020)* and *Bahg et al. (2020)*). The different dependent variables  $y_i$  are  
256 sometimes called channels or tasks, and the resulting model is called a multi-task or multi-channel  
257 Gaussian Process. The details of the specification of this model can be found in *Bonilla et al. (2008)*  
258 and *Melkumyan and Ramos (2011)*, which we summarize below. For an array of two genes only, for  
259 instance, instead of describing each vector  $y_1$  and  $y_2$  separately as multivariate gaussians of dimen-  
260 sion  $N_1$  and  $N_2$ , respectively, the concatenated vector  $[y_1 y_2]^T$  with  $N_1 + N_2$  observations can be mod-  
261 eled as a single multivariate gaussian with a covariance matrix of  $K$  dimensions  $(N_1 + N_2) \times (N_1 + N_2)$ ,  
262 or  $[y_1 y_2]^T \sim \mathcal{N}(\mu, K)$ . The diagonal blocks of the covariance matrix with dimensions  $N_1 \times N_1$  and  
263  $N_2 \times N_2$  are the same as above, and the off-diagonal blocks of dimensions  $N_2 \times N_1$  and  $N_1 \times N_2$   
264 specify the correlations  $c_{12ij}(x_{1i}, x_{2j}) = \exp\left(-\frac{|x_{1i} - x_{2j}|^2}{\ell_1^2 + \ell_2^2}\right)$  between the two points  $ij$  from channels 1  
265 and 2 (*Melkumyan and Ramos, 2011*). Finally, the signal variance for each of those blocks need to

**Table 2.** Parameter names, description, and priors for Gaussian Processes Bayesian inference.

| Parameter                          | Description                                                          | Prior                                              |
|------------------------------------|----------------------------------------------------------------------|----------------------------------------------------|
| $s$                                | Standard deviations of data (one for each channel)                   | n/a                                                |
| $\hat{\sigma}_i^2, (V_{\sigma,i})$ | Signal variance expectation (variance) from single-channel $i$ model | n/a                                                |
| $\hat{\ell}_i, (V_{\ell,i})$       | Bandwidth expectation (variance) from single-channel $i$ model       | n/a                                                |
| $\sigma_{ii}^2$                    | Signal variance for channels $i$                                     | $\mathcal{N}(\hat{\sigma}_i, \sqrt{V_{\sigma,i}})$ |
| $\sigma_{ij}^2$                    | Signal covariance between channels $i$ and $j$                       | $\mathcal{N}(0, \max(s))$                          |
| $\ell$                             | Bandwidth parameters                                                 | $\mathcal{N}(\hat{\ell}_i, \sqrt{V_{\ell,i}})$     |
| $\tilde{f}$                        | Gaussian Process latent normal variates                              | $\mathcal{N}(0, 1)$                                |
| $\phi$                             | inverse of square of dispersion parameter ( $\phi = 1/\alpha^2$ )    | $\mathcal{N}(0, 1)$                                |

266 be specified, and the final matrix is given by  $K = \begin{bmatrix} K_{11} & K_{12} \\ K_{21} & K_{22} \end{bmatrix} = \begin{bmatrix} \sigma_1^2 C_{11} & \sigma_{12}^2 C_{12} \\ \sigma_{12}^2 C_{12} & \sigma_2^2 C_{22} \end{bmatrix}$  (Bonilla et al.,  
 267 2008), and the mean of the multivariate gaussian is specified by a concatenated vector  $\mu = [\mu_1 \mu_2]^T$ .  
 268 The number of parameters is reduced by recognizing that the covariance matrix is symmetric so in  
 269 this example  $\sigma_{21}^2 = \sigma_{12}^2$ , where we also dropped the subscript  $f$ . For this model, the variation in the  
 270 RNA levels of say gene 1 is a function not only of  $\sigma_1^2$ , but also of  $\sigma_{21}^2 = \sigma_{12}^2$ . Therefore, fitting the data  
 271 with this model infers interaction between genes from scratch without any external information  
 272 not contained in the array of RNA-seq counts.

273 The model can be extended to any number of genes, although computational requirements for  
 274 performing the necessary matrix operations on  $K$  also grow with its size and may be limiting – the  
 275 computational and mathematical limitations of this approach are discussed in the appendix.

## 276 Bayesian MCMC inference of Gaussian Processes

277 Analogously to GLM models, we maintain the negative binomial likelihood for the Gaussian Pro-  
 278 cess inference, but unlike the transition between linear models and their generalized versions, the  
 279 incorporation of non-gaussian likelihoods is not as straightforward, and requires methods to ap-  
 280 proximate the underlying latent Gaussian Process model, leading to what is sometimes referred  
 281 to as Gaussian Process Classification (Rasmussen and Williams, 2006). Because of the Bayesian in-  
 282 ference implemented for this model we chose to infer the latent function via Markov Chain Monte  
 283 Carlo sampling as these variables can be estimated jointly with the other parameters and have  
 284 priors that by design are standard gaussian, and therefore are straightforward to specify. Table  
 285 2 gives the description of all parameters in the Multi-Channel Gaussian Process model and their  
 286 priors.

287 The number of covariance parameters in a multi-channel Gaussian Process model with  $M$  chan-  
 288 nels is  $(M^2 - M)/2$ , and the total number of parameters scales roughly as  $\mathcal{O}(M^2)$  as the number  
 289 of channels becomes large. For 100 genes, for instance, that would result in about 5,000 covari-  
 290 ances. Due to the statistical challenge of exploring a parameter space with a dimension of several  
 291 thousand, as well the computational demand of factorizing a large matrix at each MCMC step, the  
 292 estimation of the signal covariance parameters between genes was not performed jointly. Instead,  
 293 each pair of genes was fitted separately, with a single-channel Gaussian Process being first used  
 294 to estimate the signal variance and bandwidth parameters for each gene and this estimate being  
 295 used as a prior for the (pairwise) joint inference. This procedure effectively breaks down a Gaus-  
 296 sian Process inference of any size into several smaller inference problems requiring factorization  
 297 of a matrix of size  $2N$ , with a total number of parameters of the order of  $N$ , which are computa-  
 298 tionally much more manageable and can be run in parallel. Because the covariance parameters  
 299 depend only on the relationship between two variables (here, genes), separate estimation does  
 300 not affect inference of the parameters; in fact, it removes the constraint of positive-definiteness  
 301 on the matrix of covariances of all genes (which instead applies to the matrix of two genes only,



302 see Appendix I).

303 Eight parallel chains were run for each estimation with 40 thousand samples each; half were  
304 excluded as warm-up and 1 out of every 40 was kept for further calculations. Convergence was  
305 assessed using the  $\hat{R}$  metric and observing the number of effective samples (ESS) (*Gelman et al.,*  
306 **2013**). The annotated model implemented in the Stan probabilistic language is made available in  
307 the supplementary material. Because inference was done separately for each selection scheme,  
308 differences between them were assessed by comparing the posterior distribution of the parame-  
309 ters of interest.

## 310 Results

### 311 Phenotypic response to artificial selection

312 The selection procedure for night sleep was very effective. Long-sleeper and short-sleeper popu-  
313 lations had significant differences in night sleep across all generations ( $P_{Sel} = 0.0003$ ); in fact, night  
314 sleep was different for the two selection schemes for each generation considered separately ex-  
315 cept for generations 0 and 1 (Supplementary Tables S1 and S2). Both males and females responded  
316 equally to the selection procedure. Figure 1A shows the phenotypic response to 13 generations of  
317 selection for night sleep. At generation 13, the long-sleeper populations averaged  $642.2 \pm 3.83$  and  
318  $667.8 \pm 2.97$  minutes of night sleep for Replicate 1 and Replicate 2, respectively. The short-sleeper  
319 populations averaged  $104.3 \pm 6.71$  and  $156.2 \pm 8.76$  minutes of night sleep for Replicate 1 and Repli-  
320 cate 2, respectively. The average difference between the long- and short-sleeper lines was 537.9  
321 minutes for Replicate 1, and 511.6 minutes for Replicate 2. In contrast, the two control populations  
322 did not have differences in their night sleep after 13 generations of random mating ( $P_{Gen} = 0.7083$ ;  
323 Supplementary Table S3). In the initial generation, night sleep was  $519.6 \pm 10.57$  minutes in the Repli-  
324 cate 1 control and  $567.9 \pm 7.63$  minutes in the Replicate 2 control. At generation 13, night sleep was  
325  $563.4 \pm 7.62$  and  $542.3 \pm 7.91$  in Replicates 1 and 2, respectively, a difference of only 43.8 and 25.6  
326 minutes. These negligible changes in night sleep in the control population suggest that there is  
327 little inbreeding depression occurred over the course of the experiment (*Falconer and Mackay,*  
328 **1996**). Selection was asymmetric, with a greater phenotypic response in the direction of reduced  
329 night sleep. Note also that night sleep is bounded from 0 to 720 minutes, and the initial generation  
330 had 515.39 minutes of night sleep on average across all populations, a fairly long night sleep phe-  
331 notype. This high initial sleep may explain why the response to selection for short night sleep was  
332 more effective. Night sleep is sexually dimorphic (*Harbison and Sehgal, 2008; Harbison et al., 2009,*  
333 **2013**); yet both males and females responded to the selection protocol equally ( $P_{Sel \times Sex} = 0.9492$ ;  
334 Supplementary Table S1). Thus, we constructed a set of selection populations with nearly 9 hours  
335 difference in night sleep.

336 In an artificial selection experiment, some amount of inbreeding will necessarily take place.  
337 Only a subset of the animals are selected each generation as parents; thus phenotypic variance is  
338 expected to decrease as selection proceeds (*Falconer and Mackay, 1996*).

339 However, this is not the case for all artificial selection experiments (*Falconer and Mackay, 1996*).  
340 We calculated the coefficient of environmental variation ( $CV_E$ ) (*Mackay and Lyman, 2005*) and eval-  
341 uated its trajectory across time in order to determine whether the populations were becoming  
342 more or less variable over time. As Figure 1B shows, night sleep  $CV_E$  increased over time in the  
343 short sleepers, and decreased over time in the long sleepers ( $P < 0.0001$ ; Table S4). The increase  
344 in  $CV_E$  in short sleepers was largely due to a decrease in the population mean as the standard  
345 deviation also decreased over time, indicating that the phenotypic variance decreased (Figure S2).  
346 Likewise, the standard deviation decreased in the long sleepers over time, even as the mean night  
347 sleep increased, indicating decreased variability in these populations as well. These changes in  $CV_E$   
348 mimic previous observations in populations artificially selected for sleep (*Harbison et al., 2017*). Re-  
349 gressions of the cumulated response on the cumulated selection differential were used to estimate  
350 heritability ( $h^2$ ). Long-sleeper population  $h^2$  ( $\pm SE$  of the coefficient of regression) were estimated

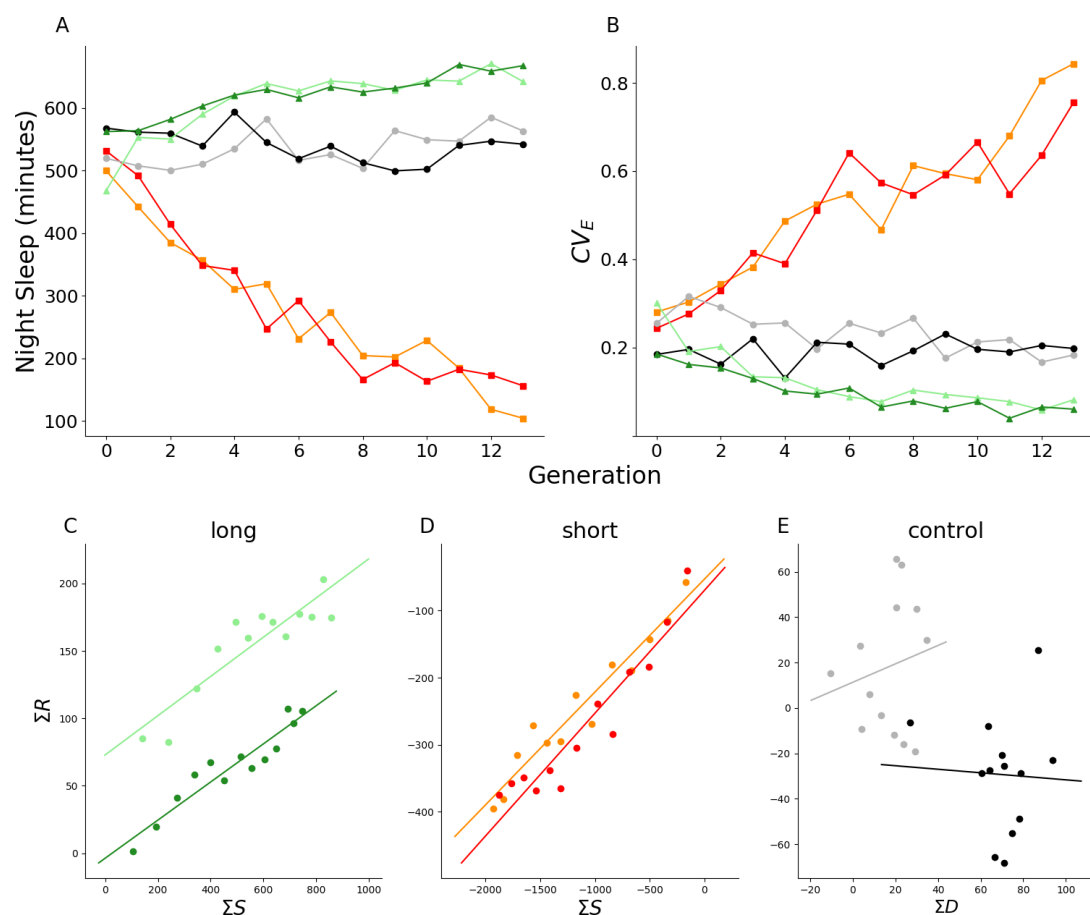

**Figure 1.** (A) Mean and (B) coefficient of environmental variation of night sleep. Plot and regression lines of cumulated selection differential ( $\Sigma S$ ) against cumulated selection response ( $\Sigma R$ ) for (C) long- and (D) short-sleeping populations, and against cumulated differential  $\Sigma D$  for (E) controls. Light green, Replicate 1 long-sleeper population; Dark green, Replicate 2 long-sleeper population; Orange, Replicate 1 short-sleeper population; Red, Replicate 2 short-sleeper population; Gray, Replicate 1 control population; Black, Replicate 2 control population.

351 as  $0.145 \pm 0.021$  and  $0.141 \pm 0.014$  (all  $P < 0.0001$ ) for Replicates 1 and 2, respectively (Figure 1C);  
 352 short-sleeper population  $h^2$  were  $0.0169 \pm 0.013$  and  $0.183 \pm 0.019$  (all  $P < 0.0001$ ) for Replicates 1  
 353 and 2 (Figure 1D). In contrast, estimated regression coefficients for the control population were  
 354 non-significant and with high standard errors associated to the regression estimates:  $0.405 \pm 0.695$   
 355 ( $P = 0.57$ ) and  $-0.078 \pm 0.487$  ( $P = 0.88$ ) for Replicates 1 and 2, respectively (Figure 1E).

### 356 **Correlated response of other sleep traits to selection for night sleep**

357 Traits that are genetically correlated with night sleep might also respond to selection for long or  
 358 short night sleep (Falconer and Mackay, 1996). Indeed, some sleep and activity traits have been  
 359 previously shown to be phenotypically and genetically correlated (Harbison and Sehgal, 2008; Har-  
 360 bison et al., 2009, 2013). We examined the other sleep and activity traits for evidence of a correlated  
 361 response to selection. Night and day average bout length ( $P = 0.0008$  and  $P = 0.0391$ , respectively)  
 362 and sleep latency ( $P = 0.0023$ ) exhibited a correlated response to selection for night sleep across  
 363 generations 0 – 13, while night and day bout number, day sleep, and waking activity did not (Figure  
 364 S2; Supplementary Table S1). In the case of day average bout length, the correlated response was  
 365 sex-specific to males ( $P = 0.0140$ ) (Supplementary Table S1). Significant correlated responses for  
 366 night and day average bout length and sleep latency did not occur in all generations (Supplement-  
 367 ary Table S2).

368 Night average bout length responded to selection for night sleep in most generations, while day  
369 average bout length responded in only four of the last six generations. Sleep latency responded to  
370 selection after the second generation. In addition, we observed significant differences between the  
371 long-sleeping and short-sleeping populations for the  $CV_E$  of all sleep traits except waking activity  
372  $CV_E$  (Figure S2; Table S4). However, the pattern of the  $CV_E$  for each trait appeared to be more  
373 random across time.

#### 374 **Phenotypes in flies used for RNA-Seq**

375 Every generation, we harvested RNA from flies chosen at random from the 200 measured for sleep  
376 in each selection population, with the exception of the flies chosen as parents for the next genera-  
377 tion. We extracted RNA from two replicates of 10 flies each per sex and selection population. Since  
378 these flies amount to only 20% of the flies measured for sleep each generation, their sleep may or  
379 may not be representative of the group as a whole. We therefore correlated the mean night sleep  
380 for each generation in the flies harvested for RNA with the mean night sleep of all flies measured  
381 to determine how similar night sleep was to the total in the group (Figure S3). The correlations  
382 were very high for the selected populations: long-sleeper flies harvested for RNA were very well  
383 correlated with the total measured in each population [ $r^2 = 0.99$  and  $0.96$  (all  $P < 0.0001$ ) for Replic-  
384 ate 1 and 2 respectively], as were short-sleepers [ $r^2 = 0.99$  for Replicate 1 and  $0.97$  for Replicate  
385 2 (all  $P < 0.0001$ )]. The control populations, which did not undergo selection, were somewhat less  
386 well correlated. Replicate 1 of the control population had an  $r^2$  of  $0.75$  ( $P = 0.0001$ ) and Replicate  
387 2 had an  $r^2$  of  $0.85$  ( $P < 0.0001$ ). Thus, the flies harvested for RNA are very good representatives of  
388 each population as a whole.

#### 389 **Hierarchical Generalized Linear Model analysis reveals that selection for night sleep 390 impacts gene expression**

391 For each gene, the linear model analysis produced posterior distributions for the parameters as  
392 well as log-likelihood values for the full and reduced models. Point estimates (MAP) are shown in  
393 Table S5 and S6 (for females and males, respectively). For the male flies 11,778 genes passed the  
394 filtering for low expression, of which 405 were found to have a significant selection scheme effect  
395 over the generations of artificial selection (i.e., significant likelihood ratio test for the  $sel \times gen$  term).  
396 Thus, the expression level shift given by the slope of the generalized linear model is different from  
397 controls and attributable to selection for long and/or short sleep. For the females 820 genes out  
398 of 9,370 with detectable expression were found to be significant. Genes with opposite trends in  
399 the short and long selection schemes were compared using the group-level parameter  $\mu_{short \times gen}$   
400 and  $\mu_{long \times gen}$  (i.e. the effect that best explains both replicates): 204 genes in the males and 384 in  
401 females showed opposite trends by that criterion. Table S7 and S8 list those genes for females and  
402 males, respectively. Between males and females, 85 genes were common to both sexes. Known  
403 functions of these 85 genes from the DAVID gene ontology database are presented in Table S9. We  
404 used these 85 genes in subsequent analyses; see below. Figure 2 shows the fit for one gene.

#### 405 **Pairwise Spearman correlation is non-specific and significant for a large fraction 406 of genes**

407 We computed Spearman correlations for all pairwise combinations of the 85 genes common be-  
408 tween sexes (Supplementary Table S10 ). Correlations computed using the Spearman method  
409 were found to be significant at 95% confidence for 2,999 of the 3,570 possible pairs. The confi-  
410 dence intervals for the correlations coefficients showed no overlap with controls for either short  
411 sleepers, long sleepers, or both populations in 1,348 of 3,570 pairs. Thus, a simple correlational  
412 analysis identifies a minimum of 38% of the possible interactions among genes as relevant.

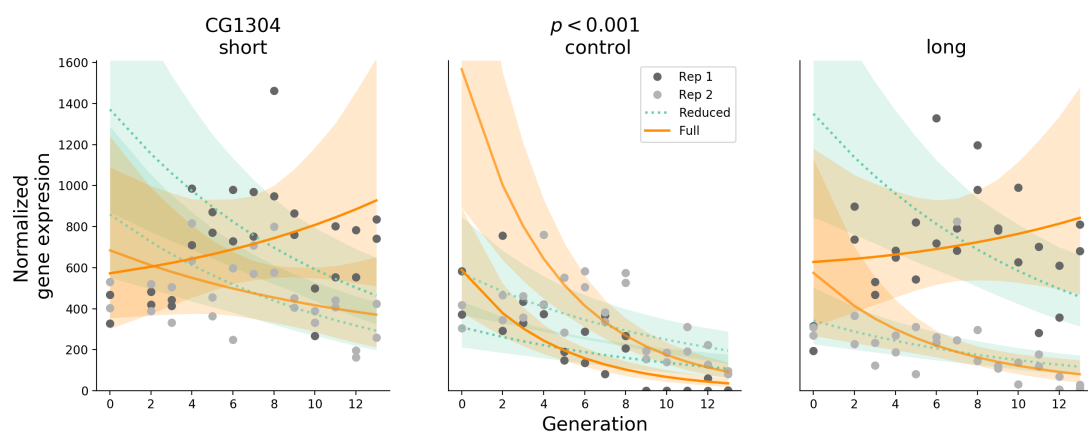

**Figure 2.** Fit of Hierarchical Generalized Linear Model to gene *CG1304* for flies selected for short sleep, unselected controls, and selected for long sleep. The solid lines show the expected value of full model, dashed lines for reduced model, and shaded regions show the 95% credibility interval. Replicate 1 data points are shown in dark gray, Replicate 2 in light gray.

### 413 **Gaussian Process model analysis uncovers nonlinear trends and specifically iden-** 414 **ties covariance in expression between genes**

415 As noted above, a simple correlational analysis suggested that large numbers of genes are poten-  
 416 tially interacting to alter sleep. Because direct computation of linear model-based correlations can-  
 417 not account for non-linear effects or spurious confounding trends we fit Gaussian Process models  
 418 that can account for temporal variation in multiple genes even in the absence of actual interactions  
 419 between them. The 85 significant genes overlapping between males and females potentially have  
 420 3,570 pairwise interactions. To that end, the parameter of interest in the Gaussian Process model  
 421 is the signal covariance between each pair of genes. This covariance is a measure of the degree  
 422 of their interaction. We applied the Gaussian Process model for each of the 3,570 pairs for each  
 423 selection scheme (long, short, and control). As an example, the model fit for one pair of genes from  
 424 the female gene expression data is shown in Figure 3.

425 Convergence for all three runs was on the order of  $|\hat{R} - 1| \approx 10^{-4}$ , and close to the 4,000  
 426 samples expected for each run; therefore, the wide confidence intervals are likely a product of  
 427 the large dispersion in the data itself. Correlation between gene expression patterns of the two  
 428 genes is computed by dividing the signal covariance by the square root of the signal variance of  
 429 each gene - e.g.  $\rho_l = \sigma_{l(ij)}^2 / \sigma_{l(i)} \sigma_{l(j)} = \sigma_{long(LysC, CG1304)}^2 / \sigma_{long(LysC)} \sigma_{long(CG1304)}$  - that is, similar to  
 430 computing a correlation coefficient from variances and covariances, but taken as the expectation  
 431 over the posterior distribution obtained from MCMC.

432 Figure 3 illustrates the nonlinear trajectories of gene expression that cannot be detected by the  
 433 GLM model. The two trajectories exhibited high signal covariance between the expression of the  
 434 two genes in the long sleepers ( $\rho_l = 0.89$ ) that was significantly different from controls; however,  
 435 intermediate covariance in the short sleepers ( $\rho_s = 0.53$ ) did overlap with that of controls, and  
 436 therefore was not significantly different.

437 Figure 3 - supplement 1 shows a pair where interactions in both short and long selection schemes  
 438 are different from controls, Figure 3 - supplement 2 shows another pair of genes where neither  
 439 scheme is different from controls. This illustrates a range of possibilities, including a case where  
 440 Spearman correlations are significant but GP correlations are not (the opposite also occurs). Fig-  
 441 ure 3 - supplements 3 and 4 fit each gene individually, and the fit does not change substantially  
 442 between single to multiple channel models.

443 The 85 single-channel fits were good despite varying levels of dispersion and occasional outliers,  
 444 indicating no issues with the Gaussian Processes ability to fit the temporal patterns of any one  
 445 gene. For the two-channel inference, upwards of 90% of the chains initially converged under the

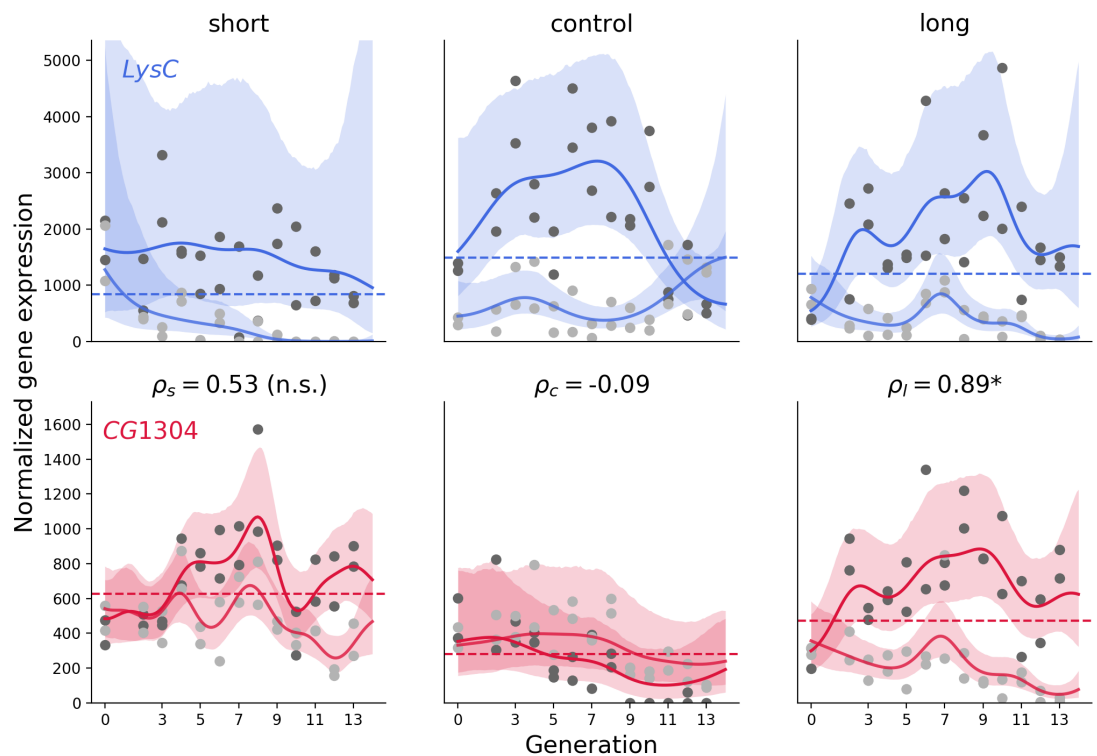

**Figure 3.** Fit of Gaussian Process model to pair of genes *LysC* and *CG1304*, for flies selected for short sleep, unselected controls, and selected for long sleep. The solid lines show the expected value, while the shaded regions show the 95% credibility interval. Replicate 1 data points are shown in dark gray, Replicate 2 in light gray). The expectation for correlations ( $\rho_{sel}$ ) is shown for each selection scheme. An asterisk indicates significant difference from controls in selection scheme, as opposed to non-significance (n.s.).

**Figure 3-Figure supplement 1.** Fit of Gaussian Process model to pair of genes *haf* and *CG1304*.

**Figure 3-Figure supplement 2.** Fit of Gaussian Process model to pair of genes *CR43242* and *CG1304*.

**Figure 3-Figure supplement 3.** Fit of single-channel Gaussian Process model to *CG1304* gene.

**Figure 3-Figure supplement 4.** Fit of single-channel Gaussian Process model to *LysC* gene.

446 criterion that  $0.95 < \hat{R} < 1.05$ ; because the inference method is stochastic it is expected that by  
 447 chance some chains may not converge and/or mix well with their replicates. Chains that initially  
 448 failed were rerun up to two times. After three runs over 99% of the chains converged; the reasons  
 449 for lack of convergence of the remaining were not investigated further. Figure 4 shows six heat  
 450 maps (one for each sex and selection scheme combination) with the correlations for all pairs of  
 451 genes calculated as described in the previous figure, summarizing the inferred interactions. Of  
 452 the 3,570 correlations, 1,612 were greater than 0.5 and 98 greater than 0.9.

453 In addition to computing expected values, the posterior distributions were used to compare  
 454 the signal covariances between selection schemes and set a cutoff. Distributions of the parameter  
 455 for each sex-selection scheme were assembled from the parallel MCMC runs; 145 gene pairs in  
 456 the selected populations are found to be different from controls (i.e. do not overlap with them at  
 457 95% credibility for either short, long or both populations). Out of the 145, twelve gene pairs were  
 458 common to between males and females selected for long night sleep and one pair to males and  
 459 females selected for short sleep; one gene pair was common to females in both selection schemes,  
 460 and three pairs were common to males. Table S10 shows the expected values of signal covariances  
 461 normalized by the variances for all two-way interactions side by side with the Spearman correla-  
 462 tions. Table S11 shows the subset of significant Gaussian Processes correlations.

463 We constructed a network for each sex/selection scheme combination based on the magnitude  
 464 of the correlation between genes. The network for males selected for long sleep having significant



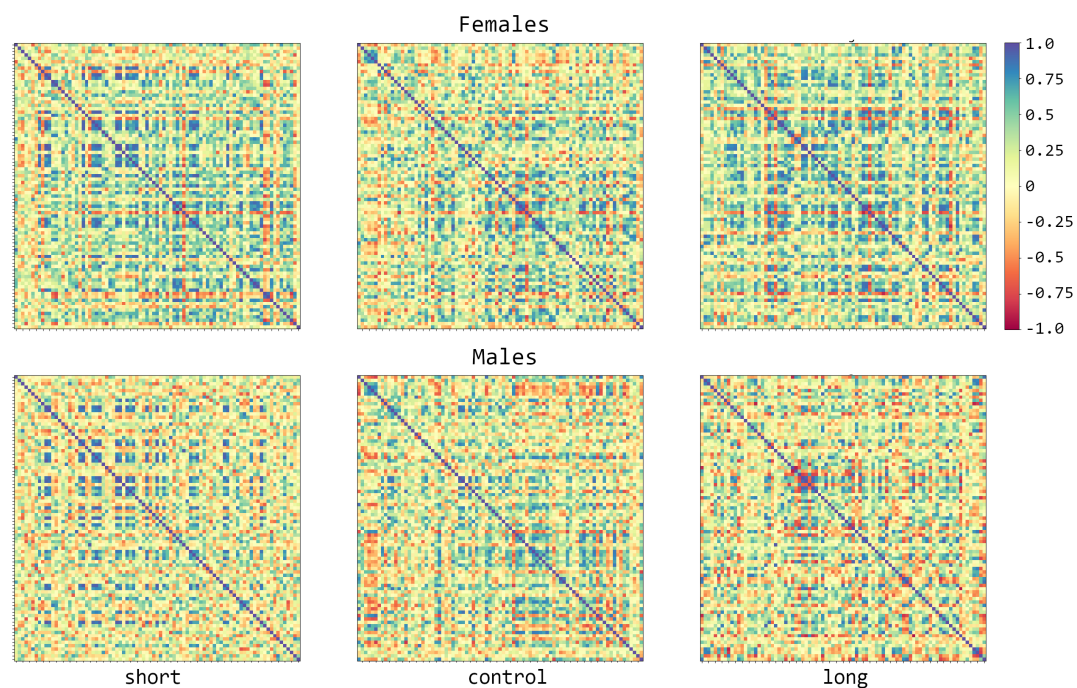

**Figure 4.** Signal variances and covariances normalized to range [-1,1] for females and males in each of the selection schemes: short, control, and long. Each off-diagonal square is the expected value of the interaction between two of 85 genes, for a total of 3,570 pairs.

465 gene interactions is shown in Figure 5 (supplements 1-3 show the networks for the remaining three  
 466 sex-selection scheme combinations).

467 For comparison, looking at significant ( $\rho_{sel} \neq 0$ ) Spearman correlations keeps almost three  
 468 thousand interactions (i.e. excludes just a bit more than a tenth of the genes), and comparing  
 469 the distributions  $\rho_{sel}$  versus  $\rho_{control}$  – similar to how the Gaussian Processes are compared – still  
 470 has over thirteen hundred. Therefore, computing correlations between genes using covariance  
 471 estimates from the Gaussian Processes greatly increases specificity over direct correlations. Fur-  
 472 thermore, the Gaussian Processes are not only more specific but more sensitive in finding 68 gene  
 473 pairs that are not found to be significant by the first Spearman approach and 18 not found by the  
 474 second.

475 Finally, we examined known interactions between the 85 genes and any other genes using the  
 476 *Drosophila* Interaction Database, DroID (Murali et al., 2011). We found 2,830 interactions; 8 of  
 477 these were one of the 3,570 between the 85 genes, but none of them overlapped with the 145  
 478 gene pairs found to be different from controls. The gene interactions we observed may therefore  
 479 be unique to extreme sleep.

## 480 Discussion

481 We have shown that robust, reproducible phenotypic changes in *Drosophila melanogaster* sleep  
 482 are associated with hundreds (405 in males, 820 in females) of individual shifts in gene expression  
 483 – and as a consequence hundreds of thousands of potential combinations [ $\binom{405}{2} > 8 \cdot 10^4$  and  
 484  $\binom{820}{2} > 3 \cdot 10^5$ ]. Nevertheless, unique interactions important to the phenotypes are a compar-  
 485 atively small number (145 out of  $\binom{85}{2} = 3570$  possible combinations of the 85 genes common to  
 486 males and females). We have also shown that these interactions cannot be found with linear model  
 487 analyses or conventional correlation calculations only, but are specifically identified using a combi-  
 488 nation of an informative experimental design with densely-sampled time points to generate a large  
 489 scale data set, and a nonparametric, nonlinear model-based approach that explicitly accounts for  
 490 covariance in gene expression. That complex traits can be mostly explained by additive effects

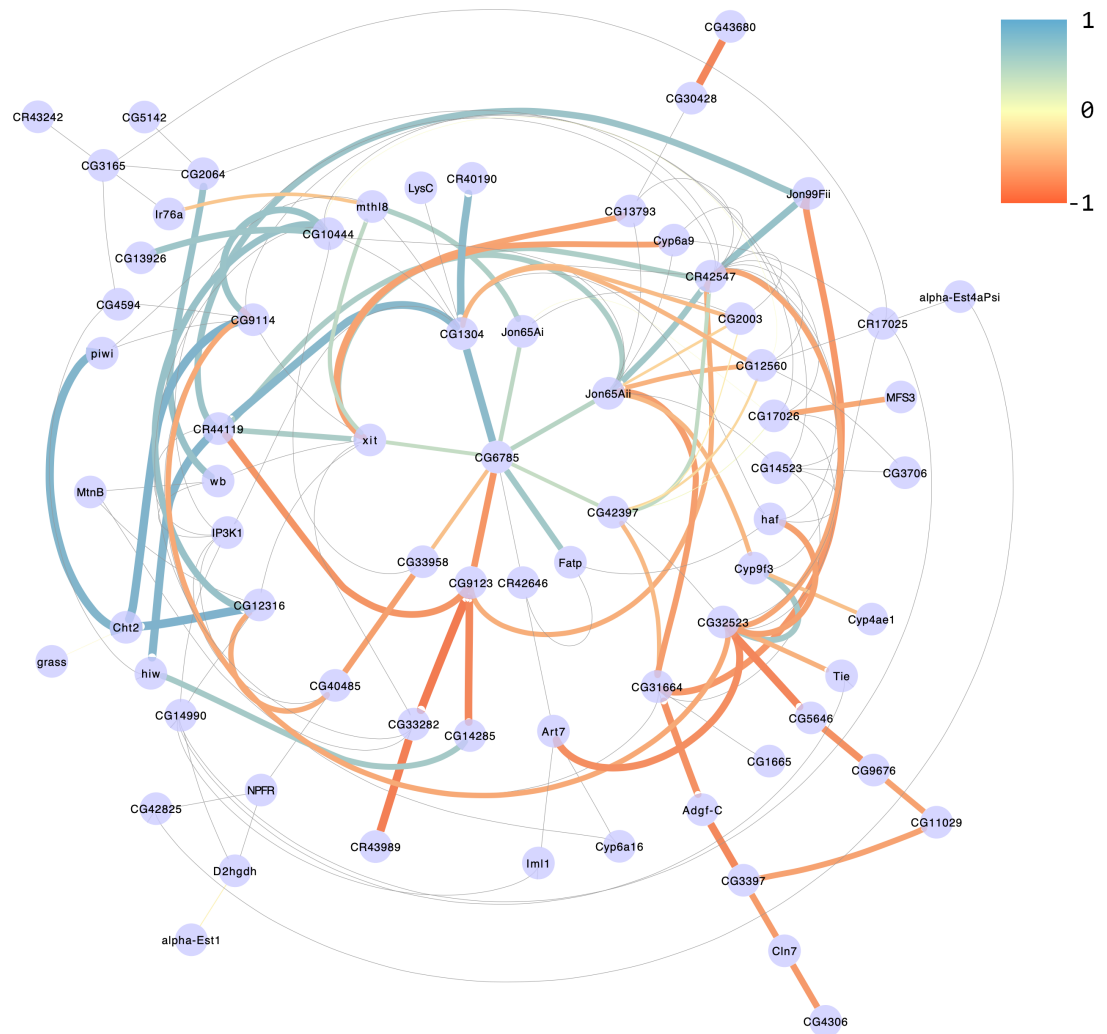

**Figure 5.** Gene interaction network in males selected for long sleep. Edges represent signal covariances whose posterior distributions do not overlap with that of controls at 95% credibility. Colors and line thickness indicate the strength and the direction of the correlation. Thin gray lines show all 145 interactions significant for at least one of the four sex-selection scheme combinations.

**Figure 5-Figure supplement 1.** Male, short sleepers

**Figure 5-Figure supplement 2.** Female, long sleepers

**Figure 5-Figure supplement 3.** Female, short sleepers

491 of individual genes (and their expression) is a common and sometimes useful assumption. While  
492 it underpins preliminary analyses that allow whole-transcriptome data to be understood, it elimi-  
493 nates the ability to infer interactions between them from the data and stops short from identifying  
494 relevant processes. Complex traits involve multiple genes, and the actual interactions giving rise to  
495 phenotypes are likely to be highly nonlinear (*Mackay, 2014*). These nonlinearities are not a math-  
496 ematical construct, but a biological reality arising from chemical kinetics. Favoring approaches  
497 that account for these features will not only increase statistical power, but understanding of actual  
498 biological mechanisms beyond simple network representations of gene expression (*DiFrisco and*  
499 *Jaeger, 2020*).

500 In most correlation and information-theory based methods the dimension (e.g. time or space)  
501 across which samples covary is only implicit (*Emmert-Streib et al., 2012*); the only possible conclu-  
502 sion from a significant correlation between two sets of observations is that one may have an effect  
503 on the other – i.e. the data alone does not allow the distinction between actual interactions and

504 spurious correlation. Bioinformatic pipelines that have correlation as their starting point – in ad-  
505 dition to carrying over its limitations – are not straightforwardly comparable to our approach (see  
506 Appendix 1). In the context of Gaussian Processes, correlation between all pairs of data points –  
507 including within the same time series, i.e. autocorrelation – is explicit in time (or other dimension),  
508 so similar trends do not necessarily imply covariance between the sets of observations. Therefore,  
509 on the one hand GPs are a nonparametric method that requires no more biological knowledge  
510 than that for computing a linear correlation; on the other hand, while not an explicit description  
511 of dynamic biological processes, it is also a model-based approach that can be used within more  
512 mechanistic formalisms like differential equations (Äijö *et al.*, 2013), or potentially be used to for-  
513 mulate specific hypotheses and build mechanistic models.

514 Although somewhat self-evident, it is important to highlight the fact that to describe correla-  
515 tions along time, multiple time points are needed – put another way, the use of a nonlinear model  
516 requires enough resolution in the data that the trajectory can be identified. To that end, a single  
517 high-resolution, large data set with a specific design, like the one generated in this work, will be  
518 more useful than several small data sets, for instance with only initial and final time points and  
519 allowing only two-sample linear comparison. Gene expression measured at the terminal genera-  
520 tion of selection and compared among selected and control groups does identify candidate genes  
521 (Pegoraro *et al.*, 2020; Brown *et al.*, 2017; Mackay *et al.*, 2005; Wertheim *et al.*, 2011; Sørensen  
522 *et al.*, 2007; Morozova *et al.*, 2007; Edwards *et al.*, 2006), but the relationship between pairs of  
523 genes is lost. Some studies evaluated gene expression during the last 2-3 generations of selection  
524 (Telonis-Scott *et al.*, 2009; Garlapow *et al.*, 2017); however, the additional sampling was used to  
525 confirm consistency rather than change across time. Our approach of sampling over time enabled  
526 us to derive interactions between genes and demonstrated that unique gene expression network  
527 profiles develop in long sleepers as compared to short sleepers.

528 When employing methods of increasing complexity or sophistication there is always the ques-  
529 tion of how relevant the inference is or, in other words, how “real” are the parameters or processes  
530 in the model. This pursuit of simplicity may favor the use of methods based on linear models as  
531 more palpable approaches and less prone to arbitrary assumptions about how the parameters  
532 are put together; however, it is important to realize that linear coefficients are no more real than  
533 those of any other model. On the contrary, biological processes are not restricted by our ability  
534 to comprehend them. Therefore, what may seem as an Occam’s Razor-like simplicity will probably  
535 hinder accurate description of nature. Systems-level understanding of complex biology requires  
536 not only more and more detailed data, but better descriptions of the processes and methodology  
537 that captures higher-order phenomena. Equivalently, experimental validation of these phenom-  
538 ena will be more technically challenging to accomplish. Despite the additional difficulties, it must  
539 be recognized that methods that cannot possibly match the complexity of nature are doomed to  
540 scratch all over the surface without realizing a deeper understanding.

## 541 **Acknowledgments**

542 We thank the members of the NISC Consortium for sequence data and helpful discussions. This  
543 work used the computational resources of the National Institutes of Health High-Performance  
544 Computing Biowulf cluster (<http://hpc.nih.gov>). This research was supported by the Intramural  
545 Research Program of the National Institutes of Health, the National Heart Lung and Blood Insti-  
546 tute.

## 547 **Author Contributions**

548 Conceptualization: C.S.-M., S.T.H.; Investigation: C.S.-M., Y.L.S.N., Y.L. Data curation and formal  
549 analysis: C.S.-M., Y.L., S.T.H. Writing: C.S.-M., S.T.H.

## 550 **Data Availability**

551 All RNA-Seq data from this study are available from the National Center for Biotechnology Infor-  
552 mation (NCBI) Gene Expression Omnibus (GEO) under the accession number GSE—.

## 553 **Competing Interests**

554 The authors have no competing interests to declare.

## 555 **References**

- 556 **Aalto A**, Viitasaari L, Ilmonen P, Mombaerts L, Gonçalves J. Gene regulatory network inference from sparsely  
557 sampled noisy data. *Nature Communications*. 2020; 11(1). doi: 10.1038/s41467-020-17217-1.
- 558 **Äijö T**, Granberg K, Lähdesmäki H. Sorad: a systems biology approach to predict and modulate dynamic sig-  
559 naling pathway response from phosphoproteome time-course measurements. *Bioinformatics*. 2013 may;  
560 29(10):1283–1291. doi: 10.1093/bioinformatics/btt130.
- 561 **Anders S**, Pyl PT, Huber W. HTSeq-A Python framework to work with high-throughput sequencing data. *Bioin-*  
562 *formatics*. 2015; doi: 10.1093/bioinformatics/btu638.
- 563 **Arbeitman MN**, Furlong EEM, Imam F, Johnson E, Null BH, Baker BS, Krasnow MA, Scott MP, Davis RW, White  
564 KP. Gene Expression During the Life Cycle of *Drosophila melanogaster*. *Science*. 2002; 297(5590):2270–2275.  
565 doi: 10.1126/science.1072152.
- 566 **Arnol D**, Schapiro D, Bodenmiller B, Saez-Rodriguez J, Stegle O. Modeling Cell-Cell Interactions from Spa-  
567 tial Molecular Data with Spatial Variance Component Analysis. *Cell Reports*. 2019; 29(1):202–211.e6. doi:  
568 10.1016/j.celrep.2019.08.077.
- 569 **Austin PC**, Hux JE. A brief note on overlapping confidence intervals. *Journal of Vascular Surgery*. 2002;  
570 36(1):194–195. doi: 10.1067/mva.2002.125015.
- 571 **Ayroles JF**, Carbone MA, Stone EA, Jordan KW, Lyman RF, Magwire MM, Rollmann SM, Duncan LH, Lawrence F,  
572 Anholt RRH, Mackay TFC. Systems genetics of complex traits in *Drosophila melanogaster*. *Nature Genetics*.  
573 2009 mar; 41(3):299–307. doi: 10.1038/ng.332.
- 574 **Bahg G**, Evans DG, Galdo M, Turner BM. Gaussian process linking functions for mind, brain, and behavior.  
575 *Proceedings of the National Academy of Sciences of the United States of America*. 2020; 117(47):29398–  
576 29406. doi: 10.1073/pnas.1912342117.
- 577 **Benjamini Y**, Hochberg Y. Controlling the False Discovery Rate: A Practical and Powerful Approach to Multiple  
578 Testing. *Journal of the Royal Statistical Society: Series B (Methodological)*. 1995 jan; 57(1):289–300. doi:  
579 10.1111/j.2517-6161.1995.tb02031.x.
- 580 **Berger RJ**, Phillips NH. Energy conservation and sleep. *Behav Brain Res*. 1995; 69:65–73. doi: 10.1016/0166-  
581 4328(95)00002-b.
- 582 **Bishop CM**. *Pattern recognition and machine learning*. Springer; 2006.
- 583 **Bonilla EV**, Chai KMA, Williams CKI. Multi-task Gaussian Process prediction. In: *Advances in Neural Information*  
584 *Processing Systems 20* NIPS Foundation; 2008. p. 153–160.
- 585 **Boyle EA**, Li YI, Pritchard JK. An Expanded View of Complex Traits: From Polygenic to Omnigenic. *Cell*. 2017  
586 jun; 169(7):1177–1186. doi: 10.1016/j.cell.2017.05.038.
- 587 **Brown EB**, Layne JE, Elchert AR, Rollmann SM. Behavioral and transcriptional response to selection for olfactory  
588 behavior in *Drosophila*. *G3: Genes, Genomes, Genetics*. 2020; 10(4):1283–1296. doi: 10.1534/g3.120.401117.
- 589 **Brown EB**, Patterson C, Pancoast R, Rollmann SM. Artificial selection for odor-guided behavior in *Drosophila*  
590 reveals changes in food consumption. *BMC Genomics*. 2017; 18(1):1–13. doi: 10.1186/s12864-017-4233-1.
- 591 **Carpenter B**, Gelman A, Hoffman MD, Lee D, Goodrich B, Betancourt M, Brubaker M, Guo J, Li P, Rid-  
592 dell A. Stan : A Probabilistic Programming Language. *Journal of Statistical Software*. 2017; 76(1). doi:  
593 10.18637/jss.v076.i01.

- 594 **Dashti HS**, Jones SE, Wood AR, Lane JM, van Hees VT, Wang H, Rhodes JA, Song Y, Patel K, Anderson SG, Beau-  
595 mont RN, Bechtold DA, Bowden J, Cade BE, Garaulet M, Kyle SD, Little MA, Loudon AS, Luik AI, Scheer FAJL, et al.  
596 Genome-wide association study identifies genetic loci for self-reported habitual sleep duration supported by  
597 accelerometer-derived estimates. *Nature Communications*. 2019; 10(1). doi: 10.1038/s41467-019-08917-4.
- 598 **Diessler S**, Jan M, Emmenegger Y, Guex N, Middleton B, Skene DJ, Ibberson M, Burdet F, Götz L, Pagni M, Sankar  
599 M, Liechi R, Hor CN, Xenarios I, Franken P. A systems genetics resource and analysis of sleep regulation in  
600 the mouse. *PLoS Biology*. 2018; 16(8). doi: 10.1371/journal.pbio.2005750.
- 601 **DiFrisco J**, Jaeger J. Genetic Causation in Complex Regulatory Systems: An Integrative Dynamic Perspective.  
602 *BioEssays*. 2020 jun; 42(6):1900226. doi: 10.1002/bies.201900226.
- 603 **Dobin A**, Davis CA, Schlesinger F, Drenkow J, Zaleski C, Jha S, Batut P, Chaisson M, Gingeras TR. STAR: Ultrafast  
604 universal RNA-seq aligner. *Bioinformatics*. 2013; doi: 10.1093/bioinformatics/bts635.
- 605 **Edwards AC**, Rollmann SM, Morgan TJ, Mackay TFC. Quantitative Genomics of Aggressive Behavior in  
606 *Drosophila melanogaster*. *PLoS Genetics*. 2006; 2(9):1386–1395. doi: 10.1371/journal.pgen.0020154.
- 607 **Emmert-Streib F**, Glazko GV, Altay G, Simoes RdM. Statistical inference and reverse engineering of gene  
608 regulatory networks from observational expression data. *Frontiers in Genetics*. 2012; 3(FEB):1–15. doi:  
609 10.3389/fgene.2012.00008.
- 610 **Falconer DS**, Mackay TFC. *Introduction to Quantitative Genetics (Fourth Edition)*; 1996.
- 611 **Faria VG**, Martins NE, Magalhães S, Paulo TF, Nolte V, Schlötterer C, Sucena É, Teixeira L. *Drosophila* Adaptation  
612 to Viral Infection through Defensive Symbiont Evolution. *PLoS Genetics*. 2016; 12(9):1–18. doi: 10.1371/jour-  
613 nal.pgen.1006297.
- 614 **Faria VG**, Martins NE, Paulo T, Teixeira L, Sucena É, Magalhães S. Evolution of *Drosophila* resistance against  
615 different pathogens and infection routes entails no detectable maintenance costs. *Evolution*. 2015 nov;  
616 69(11):2799–2809. doi: 10.1111/evo.12782.
- 617 **Ganguly-Fitzgerald I**, Donlea J, Shaw PJ. Waking Experience Affects Sleep Need in *Drosophila*. *Science*. 2006  
618 sep; 313(5794):1775–1781. doi: 10.1126/science.1130408.
- 619 **Garlapow ME**, Everett LJ, Zhou S, Gearhart AW, Fay KA, Huang W, Morozova TV, Arya GH, Turlapati L, St Armour  
620 G, Hussain YN, McAdams SE, Fochler S, Mackay TFC. Genetic and Genomic Response to Selection for Food  
621 Consumption in *Drosophila melanogaster*. *Behavior Genetics*. 2017; 47(2):227–243. doi: 10.1007/s10519-  
622 016-9819-x.
- 623 **Gelman A**, Carlin JB, Stern HS, Dunson DB, Vehtari A, Rubin DB. *Bayesian data analysis, third edition*; 2013.
- 624 **Hammerschlag AR**, Stringer S, de Leeuw CA, Sniekers S, Taskesen E, Watanabe K, Blanken TF, Dekker K, te Lin-  
625 dert BHW, Wassing R, Jonsdottir I, Thorleifsson G, Stefansson H, Gislason T, Berger K, Schormair B, Wellmann  
626 J, Winkelmann J, Stefansson K, Oexle K, et al. Genome-wide association analysis of insomnia complaints  
627 identifies risk genes and genetic overlap with psychiatric and metabolic traits. *Nature Genetics*. 2017 nov;  
628 49(11):1584–1592. doi: 10.1038/ng.3888.
- 629 **Harbison ST**, Carbone MA, Ayroles JF, Stone EA, Lyman RF, Mackay TFC. Co-regulated transcriptional networks  
630 contribute to natural genetic variation in *Drosophila* sleep. *Nature Genetics*. 2009; doi: 10.1038/ng.330.
- 631 **Harbison ST**, Chang S, Kamdar KP, Mackay TFC. Quantitative genomics of starvation stress resistance in  
632 *Drosophila*. *Genome biology*. 2005; 6:R36. doi: 10.1186/gb-2005-6-4-r36.
- 633 **Harbison ST**, McCoy LJ, Mackay TFC. Genome-wide association study of sleep in *Drosophila melanogaster*.  
634 *BMC Genomics*. 2013; 14(1):281. doi: 10.1186/1471-2164-14-281.
- 635 **Harbison ST**, Sehgal A. Quantitative Genetic Analysis of Sleep in *Drosophila melanogaster*. *Genetics*. 2008 apr;  
636 178(4):2341–2360. doi: 10.1534/genetics.107.081232.
- 637 **Harbison ST**, Serrano Negrón YL, Hansen NF, Lobell AS. Selection for long and short sleep duration in  
638 *Drosophila melanogaster* reveals the complex genetic network underlying natural variation in sleep. *PLOS*  
639 *Genetics*. 2017 dec; 13(12):e1007098. doi: 10.1371/journal.pgen.1007098.
- 640 **Hill VM**, O'Connor RM, Shirasu-Hiza M. Tired and stressed: Examining the need for sleep. *European Journal of*  
641 *Neuroscience*. 2020; 51(1):494–508. doi: 10.1111/ejn.14197.



- 642 **Honkela A**, Girardot C, Gustafson EH, Liu YH, Furlong EEM, Lawrence ND, Rattray M. Model-based method for  
643 transcription factor target identification with limited data. *Proceedings of the National Academy of Sciences*.  
644 2010 apr; 107(17):7793–7798. doi: [10.1073/pnas.0914285107](https://doi.org/10.1073/pnas.0914285107).
- 645 **Huang W**, Carbone MA, Magwire MM, Peiffer JA, Lyman RF, Stone EA, Anholt RRH, Mackay TFC. Genetic basis  
646 of transcriptome diversity in *Drosophila melanogaster*. *Proceedings of the National Academy of Sciences*.  
647 2015 nov; 112(44):E6010–E6019. doi: [10.1073/pnas.1519159112](https://doi.org/10.1073/pnas.1519159112).
- 648 **Huang W**, Massouras A, Inoue Y, Peiffer J, Ramia M, Tarone AM, Turlapati L, Zichner T, Zhu D, Lyman RF, Magwire  
649 MM, Blankenburg K, Carbone MA, Chang K, Ellis LL, Fernandez S, Han Y, Highnam G, Hjelman CE, Jack JR, et al.  
650 Natural variation in genome architecture among 205 *Drosophila melanogaster* Genetic Reference Panel lines.  
651 *Genome Research*. 2014 jul; 24(7):1193–1208. doi: [10.1101/gr.171546.113](https://doi.org/10.1101/gr.171546.113).
- 652 **Huylmans AK**, Parsch J. Population- and Sex-Biased Gene Expression in the Excretion Organs of *Drosophila*  
653 *melanogaster*. *G3: Genes | Genomes | Genetics*. 2014 dec; 4(12):2307–2315. doi: [10.1534/g3.114.013417](https://doi.org/10.1534/g3.114.013417).
- 654 **Jansen PR**, Watanabe K, Stringer S, Skene N, Bryois J, Hammerschlag AR, de Leeuw CA, Benjamins JS, Muñoz-  
655 Manchado AB, Nagel M, Savage JE, Tiemeier H, White T, Tung JY, Hinds DA, Vacic V, Wang X, Sullivan PF, van der  
656 Sluis S, Polderman TJC, et al. Genome-wide analysis of insomnia in 1,331,010 individuals identifies new risk  
657 loci and functional pathways. *Nature Genetics*. 2019 mar; 51(3):394–403. doi: [10.1038/s41588-018-0333-3](https://doi.org/10.1038/s41588-018-0333-3).
- 658 **Jin W**, Riley RM, Wolfinger RD, White KP, Passador-Gurgel G, Gibson G. The contributions of sex, genotype and  
659 age to transcriptional variance in *Drosophila melanogaster*. *Nature Genetics*. 2001 dec; 29(4):389–395. doi:  
660 [10.1038/ng766](https://doi.org/10.1038/ng766).
- 661 **Joiner WJ**. Unraveling the Evolutionary Determinants of Sleep. *Current Biology*. 2016; 26(20):R1073–R1087.  
662 doi: [10.1016/j.cub.2016.08.068](https://doi.org/10.1016/j.cub.2016.08.068).
- 663 **Jones SE**, Tyrrell J, Wood AR, Beaumont RN, Ruth KS, Tuke MA, Yaghootkar H, Hu Y, Teder-Laving M, Hayward  
664 C, Roenneberg T, Wilson JF, Del Greco F, Hicks AA, Shin C, Yun CH, Lee SK, Metspalu A, Byrne EM, Gehrman  
665 PR, et al. Genome-Wide Association Analyses in 128,266 Individuals Identifies New Morningness and Sleep  
666 Duration Loci. *PLOS Genetics*. 2016 aug; 12(8):e1006125. doi: [10.1371/journal.pgen.1006125](https://doi.org/10.1371/journal.pgen.1006125).
- 667 **Joshi SS**, Sethi M, Striz M, Cole N, Denegre JM, Ryan J, Lhamon ME, Agarwal A, Murray S, Braun RE, Fardo DW,  
668 Kumar V, Donohue KD, Sunderam S, Chesler EJ, Svenson KL, O'Hara BF. Noninvasive sleep monitoring in large-  
669 scale screening of knock-out mice reveals novel sleep-related genes. *bioRxiv*. 2019; doi: [10.1101/517680](https://doi.org/10.1101/517680).
- 670 **Kontio JAJ**, Sillanpää MJ. Scalable Nonparametric Prescreening Method for Searching Higher-Order Genetic  
671 Interactions Underlying Quantitative Traits. *Genetics*. 2019 dec; 213(4):1209–1224. doi: [10.1534/genetics.119.302658](https://doi.org/10.1534/genetics.119.302658).
- 672
- 673 **Krueger JM**, Obál F. A neuronal group theory of sleep function. *Journal of Sleep Research*. 1993 jun; 2(2):63–69.  
674 doi: [10.1111/j.1365-2869.1993.tb00064.x](https://doi.org/10.1111/j.1365-2869.1993.tb00064.x).
- 675 **Laing EE**, Möller-Levet CS, Dijk DJ, Archer SN. Identifying and validating blood mRNA biomarkers for acute  
676 and chronic insufficient sleep in humans: A machine learning approach. *Sleep*. 2019; 42(1):1–18. doi:  
677 [10.1093/sleep/zsy186](https://doi.org/10.1093/sleep/zsy186).
- 678 **Lane JM**, Jones SE, Dashti HS, Wood AR, Aragam KG, van Hees VT, Strand LB, Winsvold BS, Wang H, Bowden  
679 J, Song Y, Patel K, Anderson SG, Beaumont RN, Bechtold DA, Cade BE, Haas M, Kathiresan S, Little MA, Luik  
680 AI, et al. Biological and clinical insights from genetics of insomnia symptoms. *Nature Genetics*. 2019 mar;  
681 51(3):387–393. doi: [10.1038/s41588-019-0361-7](https://doi.org/10.1038/s41588-019-0361-7).
- 682 **Lin Y**, Chen ZX, Oliver B, Harbison ST. Microenvironmental gene expression plasticity among indi-  
683 vidual *drosophila melanogaster*. *G3: Genes, Genomes, Genetics*. 2016; 6(12):4197–4210. doi:  
684 [10.1534/g3.116.035444](https://doi.org/10.1534/g3.116.035444).
- 685 **Liu ZP**. Reverse Engineering of Genome-wide Gene Regulatory Networks from Gene Expression Data. *Current*  
686 *Genomics*. 2015; 16(1):3–22. doi: [10.2174/1389202915666141110210634](https://doi.org/10.2174/1389202915666141110210634).
- 687 **Love MI**, Huber W, Anders S. Moderated estimation of fold change and dispersion for RNA-seq data with  
688 DESeq2. *Genome Biology*. 2014 dec; 15(12):550. doi: [10.1186/s13059-014-0550-8](https://doi.org/10.1186/s13059-014-0550-8).
- 689 **Ly S**, Pack AI, Naidoo N. The neurobiological basis of sleep: Insights from *Drosophila*. *Neuroscience and*  
690 *Biobehavioral Reviews*. 2018; 87:67–86. doi: [10.1016/j.neubiorev.2018.01.015](https://doi.org/10.1016/j.neubiorev.2018.01.015).
- 691 **Mackay DJ**. Information theory, inference and learning algorithms. Cambridge university press; 2003.

- 692 **Mackay TFC**, Heinsohn SL, Lyman RF, Moehring AJ, Morgan TJ, Rollmann SM. Genetics and genomics of  
693 *Drosophila* mating behavior. *Proceedings of the National Academy of Sciences*. 2005 may; 102(Supplement  
694 1):6622–6629. doi: [10.1073/pnas.0501986102](https://doi.org/10.1073/pnas.0501986102).
- 695 **Mackay TFC**, Richards S, Stone EA, Barbadilla A, Ayroles JF, Zhu D, Casillas S, Han Y, Magwire MM, Cridland JM,  
696 Richardson MF, Anholt RRH, Barrón M, Bess C, Blankenburg KP, Carbone MA, Castellano D, Chaboub L, Dun-  
697 can L, Harris Z, et al. The *Drosophila melanogaster* Genetic Reference Panel. *Nature*. 2012 feb; 482(7384):173–  
698 178. doi: [10.1038/nature10811](https://doi.org/10.1038/nature10811).
- 699 **Mackay TFC**. Epistasis and quantitative traits: Using model organisms to study gene-gene interactions. *Nature*  
700 *Reviews Genetics*. 2014; 15(1):22–33. doi: [10.1038/nrg3627](https://doi.org/10.1038/nrg3627).
- 701 **Mackay TF**, Lyman RF. *Drosophila* bristles and the nature of quantitative genetic variation. *Philosophical*  
702 *Transactions of the Royal Society B: Biological Sciences*. 2005; 360(1459):1513–1527.
- 703 **McDowell IC**, Manandhar D, Vockley CM, Schmid AK, Reddy TE, Engelhardt BE. Clustering gene expression time  
704 series data using an infinite Gaussian process mixture model. *PLoS Computational Biology*. 2018; 14(1):1–27.  
705 doi: [10.1371/journal.pcbi.1005896](https://doi.org/10.1371/journal.pcbi.1005896).
- 706 **Melkumyan A**, Ramos F. Multi-kernel Gaussian processes. In: *IJCAI International Joint Conference on Artificial*  
707 *Intelligence*; 2011. p. 1408–1413. doi: [10.5591/978-1-57735-516-8/IJCAI11-238](https://doi.org/10.5591/978-1-57735-516-8/IJCAI11-238).
- 708 **Morozova TV**, Anholt RRH, Mackay TFC. Phenotypic and transcriptional response to selection for alcohol sen-  
709 sitivity in *Drosophila melanogaster*. *Genome Biology*. 2007; 8(10):1–15. doi: [10.1186/gb-2007-8-10-r231](https://doi.org/10.1186/gb-2007-8-10-r231).
- 710 **Murali T**, Pacifico S, Yu J, Guest S, Roberts GG, Finley RL. DroID 2011: a comprehensive, integrated resource  
711 for protein, transcription factor, RNA and gene interactions for *Drosophila*. *Nucleic Acids Research*. 2011 jan;  
712 39(suppl\_1):D736–D743. doi: [10.1093/nar/gkq1092](https://doi.org/10.1093/nar/gkq1092).
- 713 **Parisi M**, Nuttall R, Naiman D, Bouffard G, Malley J, Andrews J, Eastman S, Oliver B. Paucity of Genes on  
714 the *Drosophila* X Chromosome Showing Male-Biased Expression. *Science*. 2003; 299(5607):697–700. doi:  
715 [10.1126/science.1079190](https://doi.org/10.1126/science.1079190).
- 716 **Pegoraro M**, Flavell LMM, Menegazzi P, Colombi P, Dao P, Helfrich-Forster C, Tauber E. The genetic basis  
717 of diurnal preference in *Drosophila melanogaster*. *BMC Genomics*. 2020; 21(1). doi: [10.1186/s12864-020-](https://doi.org/10.1186/s12864-020-07020-z)  
718 [07020-z](https://doi.org/10.1186/s12864-020-07020-z).
- 719 **Rasmussen CE**, Williams CKI. *Gaussian Processes for Machine Learning*. The MIT Press; 2006. doi: [10.7551/mit-](https://doi.org/10.7551/mit-press/3206.001.0001)  
720 [press/3206.001.0001](https://doi.org/10.7551/mit-press/3206.001.0001).
- 721 **Ruscio J**. Constructing confidence intervals for Spearman's rank correlation with ordinal data: A simulation  
722 study comparing analytic and bootstrap methods. *Journal of Modern Applied Statistical Methods*. 2008;  
723 7(2):416–434. doi: [10.22237/jmasm/1225512360](https://doi.org/10.22237/jmasm/1225512360).
- 724 **Scharf MT**, Naidoo N, Zimmerman JE, Pack AI. The energy hypothesis of sleep revisited. *Progress in Neurobi-*  
725 *ology*. 2008; 86(3):264–280. doi: [10.1016/j.pneurobio.2008.08.003](https://doi.org/10.1016/j.pneurobio.2008.08.003).
- 726 **Schlötterer C**, Kofler R, Versace E, Tobler R, Franssen SU. Combining experimental evolution with next-  
727 generation sequencing: a powerful tool to study adaptation from standing genetic variation. *Heredity*. 2015  
728 may; 114(5):431–440. doi: [10.1038/hdy.2014.86](https://doi.org/10.1038/hdy.2014.86).
- 729 **Schmidt MH**. The energy allocation function of sleep: A unifying theory of sleep, torpor, and  
730 continuous wakefulness. *Neuroscience & Biobehavioral Reviews*. 2014 nov; 47:122–153. doi:  
731 [10.1016/j.neubiorev.2014.08.001](https://doi.org/10.1016/j.neubiorev.2014.08.001).
- 732 **Schulz E**, Speekenbrink M, Krause A. A tutorial on Gaussian process regression: Modelling, exploring, and  
733 exploiting functions. *Journal of Mathematical Psychology*. 2018; doi: [10.1016/j.jmp.2018.03.001](https://doi.org/10.1016/j.jmp.2018.03.001).
- 734 **Serrano Negron YL**, Hansen NF, Harbison ST. The Sleep Inbred Panel, a Collection of Inbred *Drosophila*  
735 *melanogaster* with Extreme Long and Short Sleep Duration. *G3: Genes|Genomes|Genetics*. 2018 sep;  
736 8(9):2865–2873. doi: [10.1534/g3.118.200503](https://doi.org/10.1534/g3.118.200503).
- 737 **Sørensen JG**, Nielsen MM, Loeschcke V. Gene expression profile analysis of *Drosophila melanogaster* se-  
738 lected for resistance to environmental stressors. *Journal of Evolutionary Biology*. 2007; 20(4):1624–1636.  
739 doi: [10.1111/j.1420-9101.2007.01326.x](https://doi.org/10.1111/j.1420-9101.2007.01326.x).

- 740 **Telonis-Scott M**, Hallas R, McKechnie SW, Wee CW, Hoffmann AA. Selection for cold resistance alters gene  
741 transcript levels in *Drosophila melanogaster*. *Journal of Insect Physiology*. 2009; 55(6):549–555. doi:  
742 [10.1016/j.jinsphys.2009.01.010](https://doi.org/10.1016/j.jinsphys.2009.01.010).
- 743 **Tononi G**, Cirelli C. Sleep and the Price of Plasticity: From Synaptic and Cellular Homeostasis to Memory Con-  
744 solidation and Integration. *Neuron*. 2014; 81(1):12–34. doi: [10.1016/j.neuron.2013.12.025](https://doi.org/10.1016/j.neuron.2013.12.025).
- 745 **Velten B**, Braunger JM, Arnol D, Argelaguet R, Stegle O. Identifying temporal and spatial patterns of  
746 variation from multi- modal data using MEFISTO. *bioRxiv*. 2020 dec; p. 2020.11.03.366674. doi:  
747 [10.1101/2020.11.03.366674](https://doi.org/10.1101/2020.11.03.366674).
- 748 **Villaverde AF**, Banga JR. Reverse engineering and identification in systems biology: strategies, perspectives and  
749 challenges. *Journal of The Royal Society Interface*. 2014 feb; 11(91):20130505. doi: [10.1098/rsif.2013.0505](https://doi.org/10.1098/rsif.2013.0505).
- 750 **Wayne ML**, Telonis-Scott M, Bono LM, Harshman L, Kopp A, Nuzhdin SV, McIntyre LM. Simpler mode of inher-  
751 itance of transcriptional variation in male *Drosophila melanogaster*. *Proceedings of the National Academy*  
752 *of Sciences*. 2007 nov; 104(47):18577–18582. doi: [10.1073/pnas.0705441104](https://doi.org/10.1073/pnas.0705441104).
- 753 **Wertheim B**, Kraaijeveld AR, Hopkins MG, Walther Boer M, Godfray HCJ. Functional genomics of the evo-  
754 lution of increased resistance to parasitism in *Drosophila*. *Molecular Ecology*. 2011; 20(5):932–949. doi:  
755 [10.1111/j.1365-294X.2010.04911.x](https://doi.org/10.1111/j.1365-294X.2010.04911.x).
- 756 **Xie L**, Kang H, Xu Q, Chen MJ, Liao Y, Thiyagarajan M, O'Donnell J, Christensen DJ, Nicholson C, Iliff JJ, Takano  
757 T, Deane R, Nedergaard M. Sleep drives metabolite clearance from the adult brain. *Science*. 2013;  
758 342(6156):373–377. doi: [10.1126/science.1241224](https://doi.org/10.1126/science.1241224).
- 759 **Zhang Y**, Malone JH, Powell SK, Periwal V, Spana E, MacAlpine DM, Oliver B. Expression in Aneuploid *Drosophila*  
760 S2 Cells. *PLoS Biology*. 2010 feb; 8(2):e1000320. doi: [10.1371/journal.pbio.1000320](https://doi.org/10.1371/journal.pbio.1000320).
- 761 **Zhang Y**, Sturgill D, Parisi M, Kumar S, Oliver B. Constraint and turnover in sex-biased gene expression in the  
762 genus *Drosophila*. *Nature*. 2007 nov; 450(7167):233–237. doi: [10.1038/nature06323](https://doi.org/10.1038/nature06323).

763 **Supplemental Information**

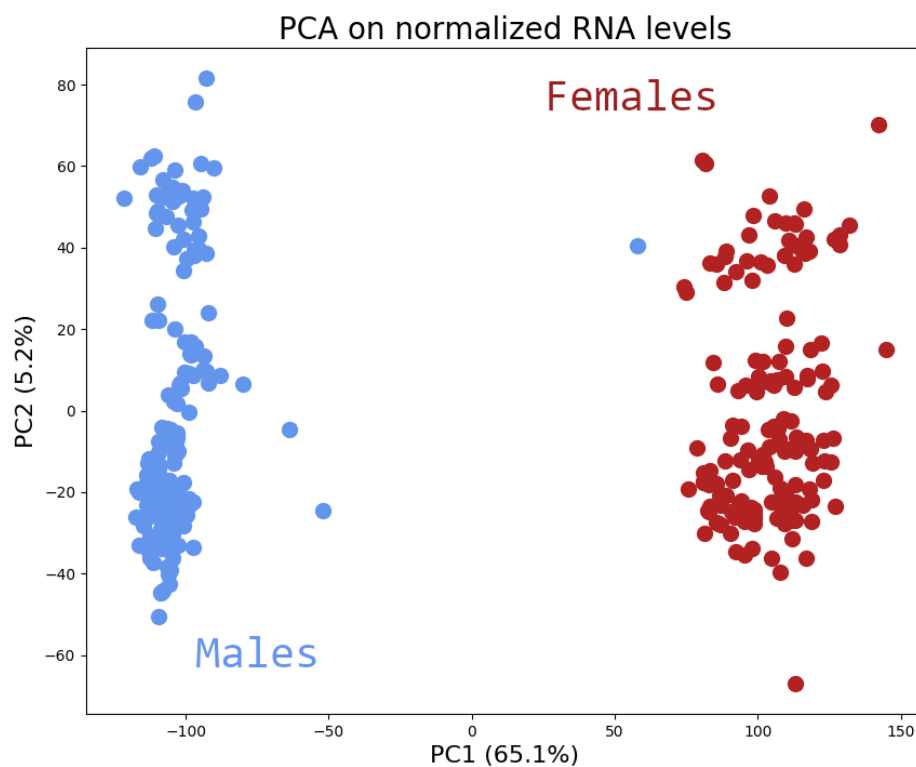

**Figure S1.** Principal Component Analysis on matrix of normalized expression data shows complete separation of sexes along the first component, which explains 65% of the variance in the data.

**Table S1.** Quantitative genetics of the response to selection for long or short night sleep and related sleep parameters. For each trait, the ANOVA analysis results are presented. Source indicates each factor in the model. *gen*, generation; *rep*, replicate; *sel*, selection; *d.f.*, degrees of freedom; M.S., Type III mean squares; *F*, *F* ratio statistic; *P*, *P*-value.

**Table S2.** Quantitative genetics of the response to selection for long or short night sleep per generation. For each sleep trait, the ANOVA analysis results are presented for each generation. Source indicates each factor in the model. *rep*, replicate; *sel*, selection; *d.f.*, degrees of freedom; M.S., Type III mean squares; *F*, *F* ratio statistic; *P*, *P*-value.

**Table S3.** Quantitative genetics of control populations. For each sleep trait, the ANOVA analysis results are presented. *gen*, generation; *rep*, replicate; *sel*, selection; *d.f.*, degrees of freedom; MS, Type III mean squares; *F*, *F* ratio statistic; *P*, *P*-value.

**Table S4.** Correlated response of sleep trait coefficient of environmental variance ( $CV_E$ ) to selection for long or short night sleep duration. For each sleep trait listed, the ANOVA results are presented. *d.f.*, degrees of freedom; M.S., Type III mean squares; *F*, *F* ratio statistic; *P*, *P*-value.

**Table S5.** GLM analysis results for each gene in females are shown as a row; the Maximum a Posteriori (MAP) parameter estimates and log-likelihoods are shown as well as *p*-values computed from the likelihood ratio test. Significance statistics corrected for multiple testing are also included, as well as the normalized counts for all samples.

**Table S6.** GLM analysis results for each gene in males are shown as a row; the Maximum a Posteriori (MAP) parameter estimates and log-likelihoods are shown as well as *p*-values computed from the likelihood ratio test. Significance statistics corrected for multiple testing are also included, as well as the normalized counts for all samples.

**Table S7.** Genes with opposite slopes for the short and long interaction terms of generation in females

**Table S8.** Genes with opposite slopes for the short and long interaction terms of generation in males

**Table S9.** Gene Ontology analysis results for 85 significant genes common to males and females.

**Table S10.** Correlations obtained from normalizing Gaussian Process signal covariances (GP correlation) and from Spearman Correlation for each of the six sex, selection scheme combinations

**Table S11.** Expected values for the correlations obtained from normalizing Gaussian Process signal covariances (GP correlation) not overlapping with controls for each of the six sex, selection scheme combinations (value missing if overlapping in that condition)



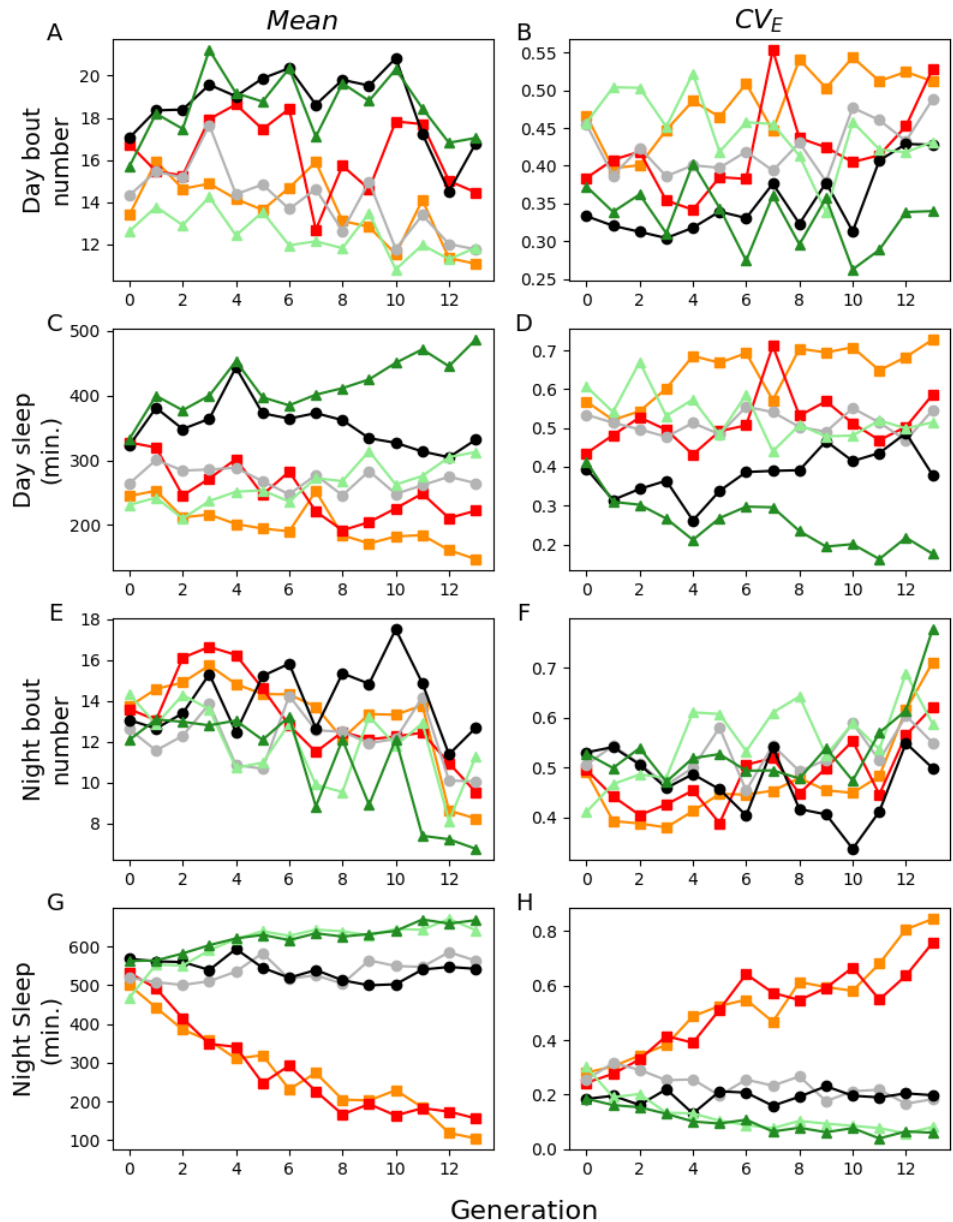

**Figure S2.** Correlated response to selection for long/short night sleep and associated coefficient of environmental variation. A, day average bout length; B, day average bout length coefficient of environmental variation ( $CV_E$ ); C, day sleep; D, day sleep  $CV_E$ ; E, night bout number; F, night bout number  $CV_E$ ; G, night sleep; H, night sleep  $CV_E$ ; I, waking activity; J, waking activity  $CV_E$ ; K, sleep latency; L, sleep latency  $CV_E$ ; M, day average bout length; N, day average bout length  $CV_E$ ; O, night average bout length; P, night average bout length  $CV_E$ . Light green, Replicate 1 long-sleeper population; Dark green, Replicate 2 long-sleeper population; Orange, Replicate 1 short-sleeper population; Red, Replicate 2 short-sleeper population; Gray, Replicate 1 control population; Black, Replicate 2 control population.  $CV_E$ , phenotypic variation.

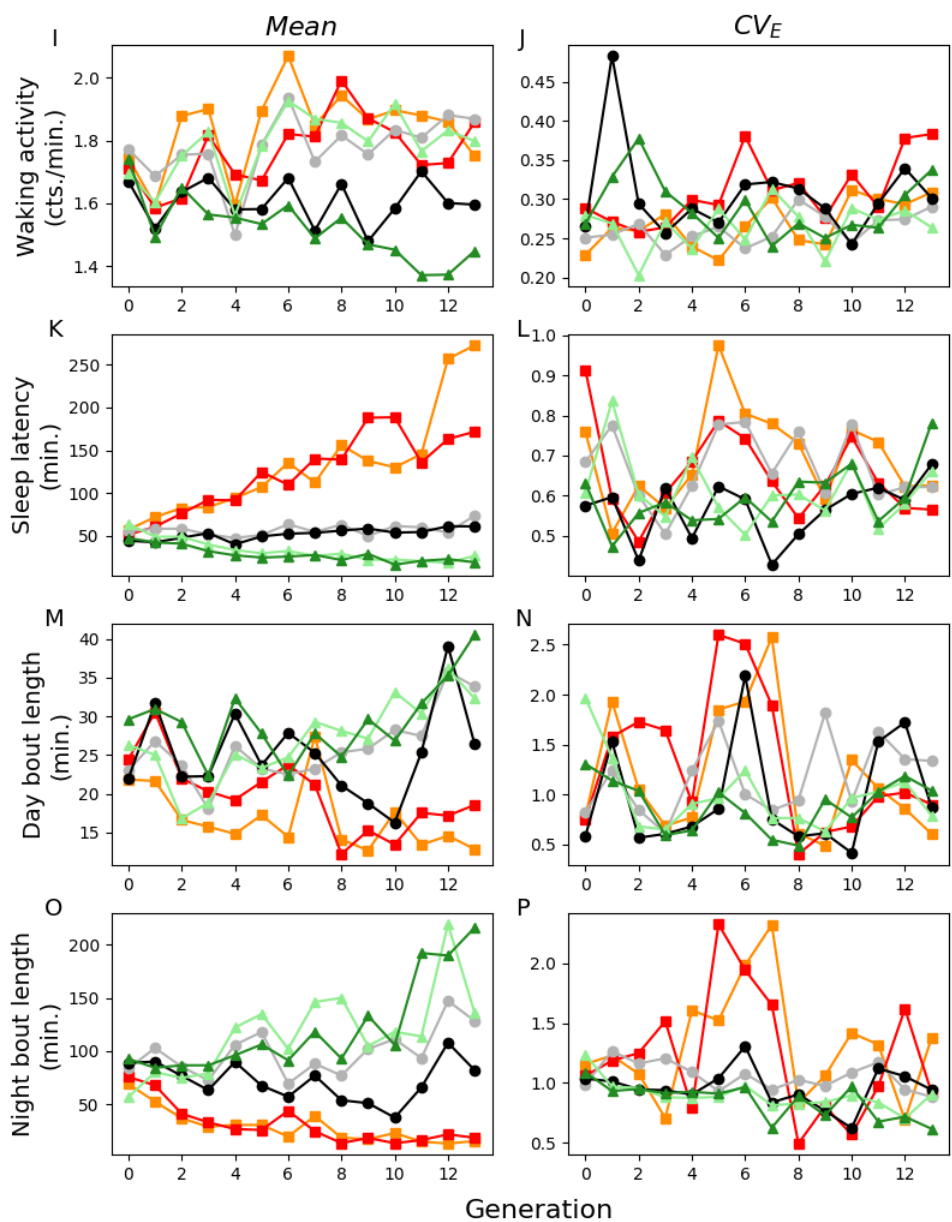

Figure S2. (Continued).

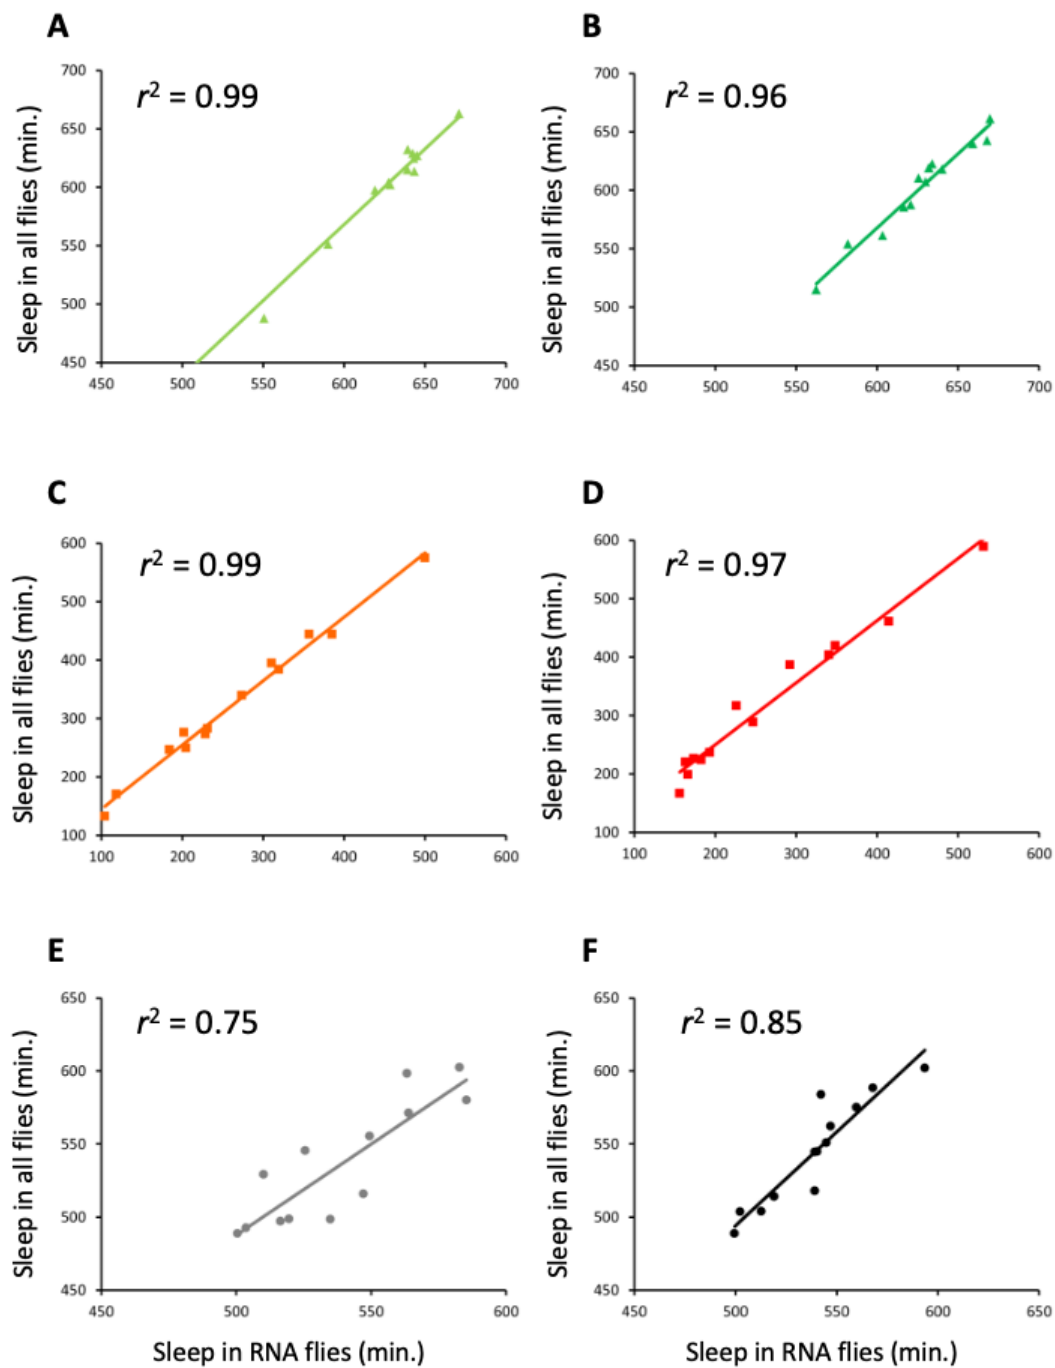

**Figure S3.** Correlation of night sleep between flies harvested for RNA and all flies in the population. A, long-sleeping Replicate 1; B, long-sleeping Replicate 2; C, short-sleeping Replicate 1; D, short-sleeping Replicate 2; E, control Replicate 1; F, control Replicate 2

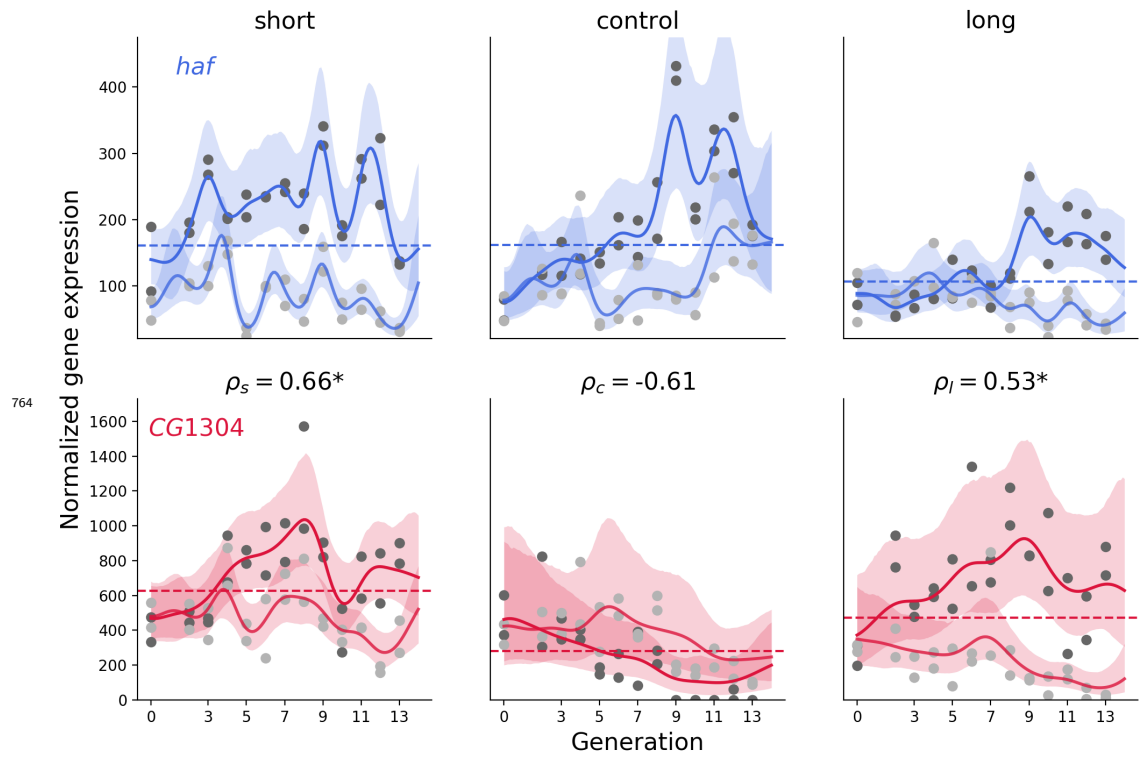

**Figure 3-Figure supplement 1.** Fit of Gaussian Process model to pair of genes *haf* and *CG1304*.

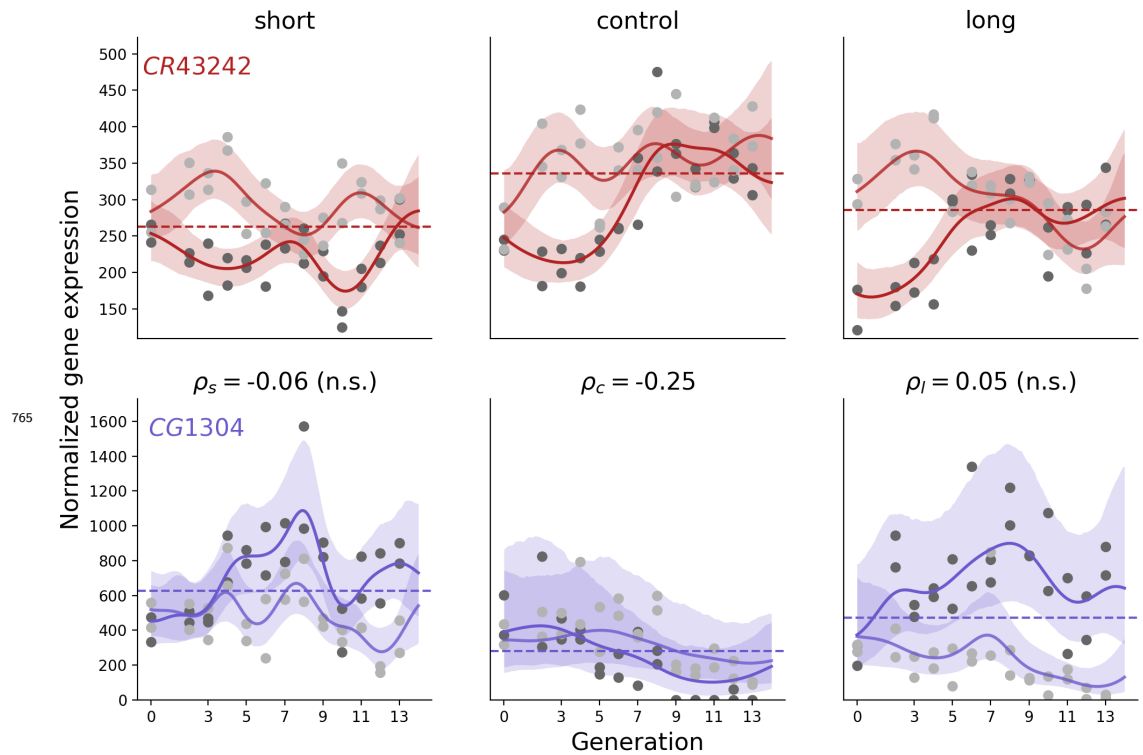

**Figure 3-Figure supplement 2.** Fit of Gaussian Process model to pair of genes *CR43242* and *CG1304*.

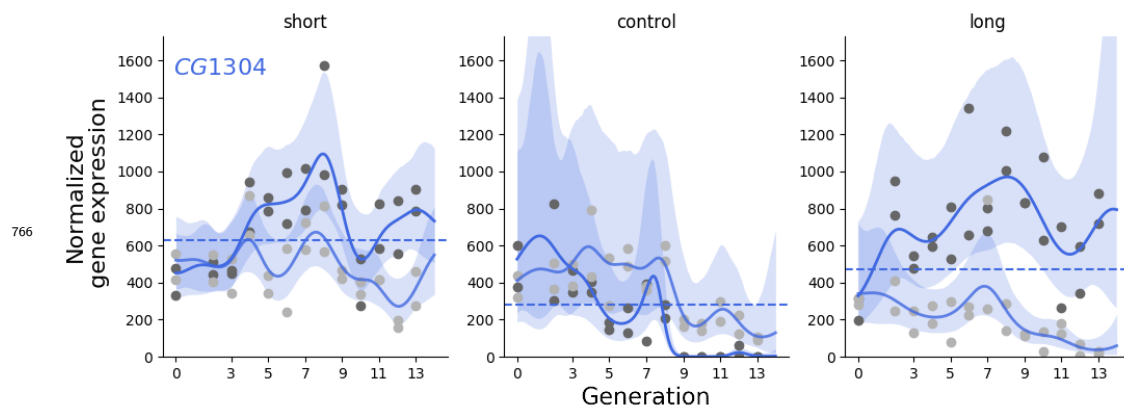

Figure 3-Figure supplement 3. Fit of single-channel Gaussian Process model to *CG1304* gene.

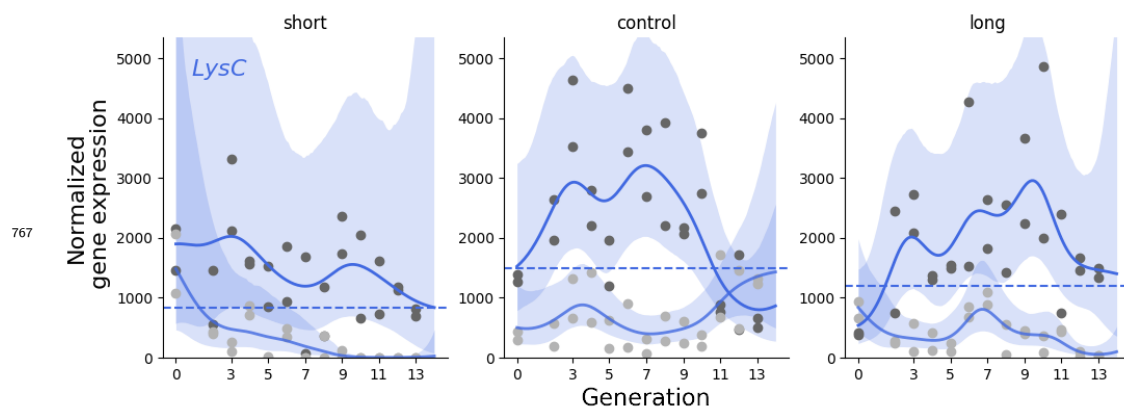

Figure 3-Figure supplement 4. Fit of single-channel Gaussian Process model to *LysC* gene.



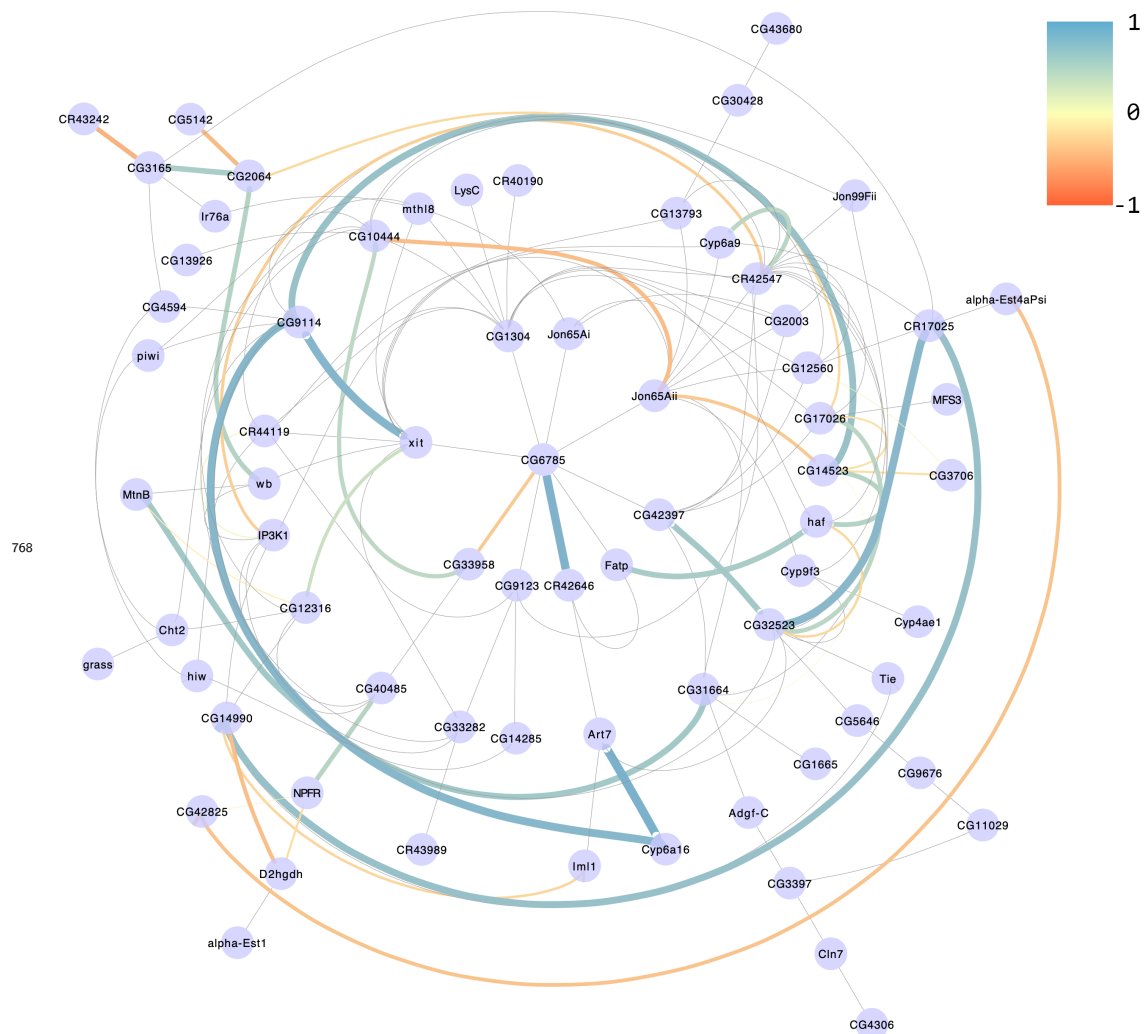

Figure 5-Figure supplement 1. Male, short sleepers

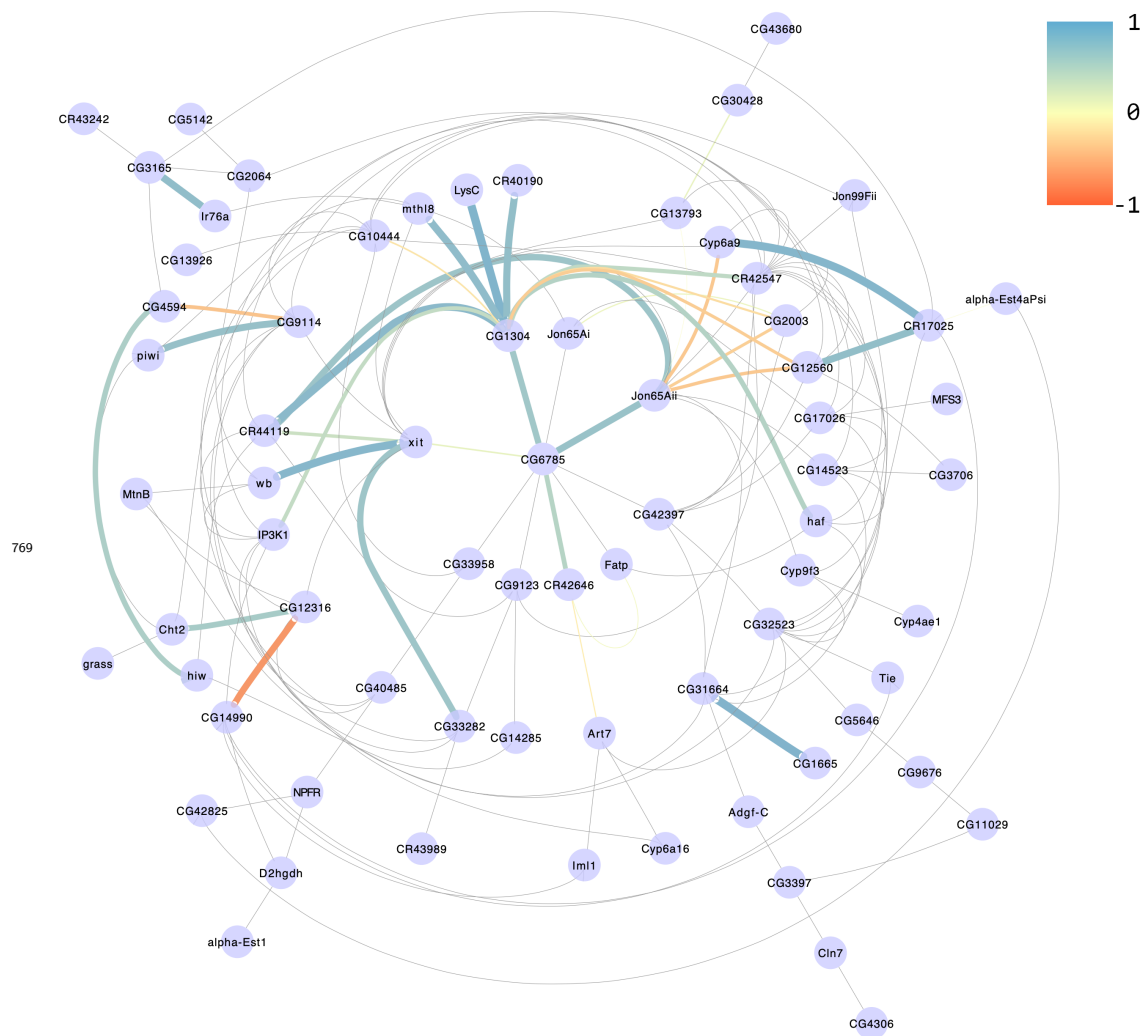

Figure 5-Figure supplement 2. Female, long sleepers
